# Supplementary material for: Hypoxia promotes erythroid differentiation through the development of progenitors and proerythroblasts
Source: PubMed Central journal article supplement — Exp Hematol. Author manuscript; Available in PMC 2021 May 7. (PMC8102433; doi:10.1016/j.exphem.2021.02.012), 2021-03-03
Supplement: NIHMS1690598-supplement-1.pdf [file NIHMS1690598-supplement-1.pdf]

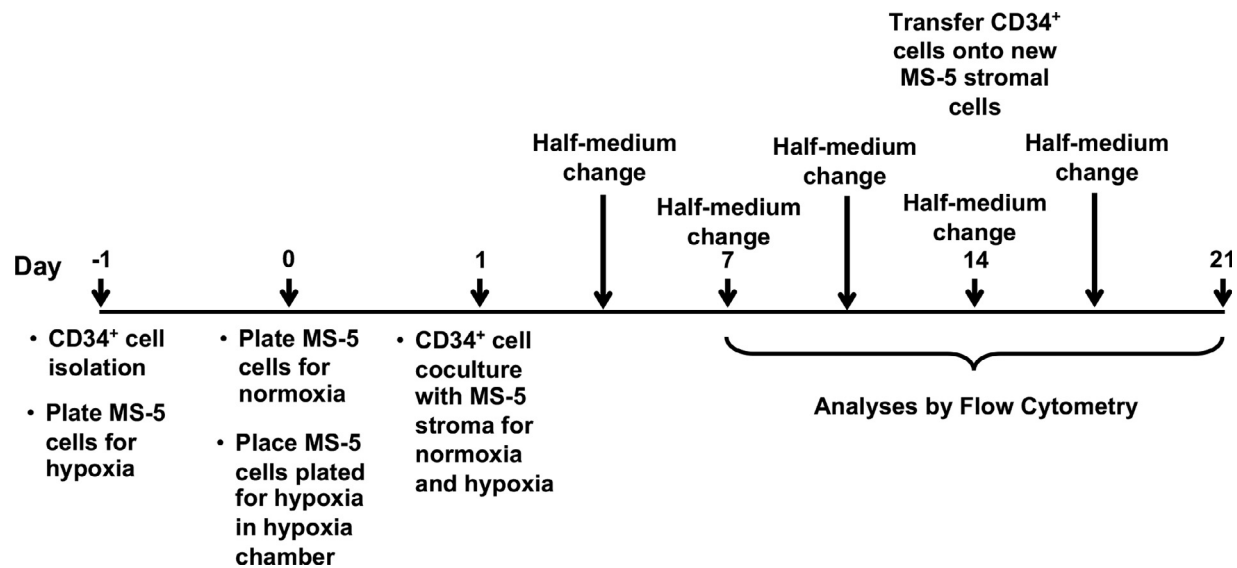

**Figure E1. Experimental timeline.** Schematic for experimental timeline of myelo-erythroid differentiation of CD34<sup>+</sup> HSPCs in hypoxia or normoxia. CD34<sup>+</sup> cells were isolated and stimulated for 48 hours, and then cocultured with MS-5 stromal cells in normoxia (21% oxygen) or hypoxia (1% oxygen). Half-medium changes were carried out every 3-4 days. On day 14, the cultures in hypoxia and normoxia were transferred onto freshly seeded MS-5 cells. Flow cytometry analysis was performed on days 1, 7, 14, and 21.







Table E1 (Continued)

| Sample ID                    | QC1       | Exp6<br>H D4 | FMI         | Exp5 N D4   | Exp2 H D4   | Exp2 N D4   | QC2         | Exp5 H D4   | Exp3 N D4   | Exp6 N D4   | FM2         | QC3         | Exp1 H D4   | Exp1 N D4   | Exp3 H D4   | FM3         | Exp4 N D4   | Exp4 H D4   | QC4         | CV %<br>(QC) > 1000<br>% |
|------------------------------|-----------|--------------|-------------|-------------|-------------|-------------|-------------|-------------|-------------|-------------|-------------|-------------|-------------|-------------|-------------|-------------|-------------|-------------|-------------|--------------------------|
| <b>Betaine</b>               | 266940    | 30758110.64  | 38634178.23 | 47595911.26 | 36503437.76 | 46076557.08 | 31294025.33 | 36690895.10 | 44235880.94 | 42073187.35 | 46766794.41 | 35319710.02 | 39955524.42 | 42769756.11 | 41137604.12 | 45259599.55 | 49991123.66 | 44640080.11 | 40083624.20 | 17.1261.29               |
|                              | 26.52     |              |             |             |             |             |             |             |             |             |             |             |             |             |             |             |             |             |             |                          |
| <b>Hepiadicaranoic acid</b>  | 314814.71 | 163297.60    | 228334.12   | 224270.45   | 250796.21   | 195993.58   | 287748.49   | 132653.84   | 234299.68   | 184713.71   | 277637.58   | 257213.37   | 148413.63   | 291115.90   | 156322.06   | 264499.14   | 177454.22   | 170750.03   | 382730.44   | 17.2361.29               |
| <b>Citrulline</b>            | 87422.56  | 274021.80    | 404992.92   | 218401.02   | 232945.81   | 265326.02   | 59837.95    | 288560.42   | 245706.77   | 225848.07   | 334890.72   | 90168.72    | 381884.11   | 260195.02   | 283237.97   | 418407.51   | 291226.14   | 317123.56   | 78922.01    | 17.3261.29               |
| <b>2-Hydroxybenzoic acid</b> | 8629.72   | 9978.57      | 6962.42     | 12970.31    | 8558.65     | 16391.20    | 12172.27    | 12082.65    | 16022.68    | 12587.95    | 7013.54     | 8369.77     | 13744.77    | 9676.12     | 16744.15    | 5249.73     | 17685.21    | 14570.58    | 9175.82     | 18.3261.29               |
| <b>Adonitol</b>              | 1989.16   | 1198.40      | 2816.89     | 4303.98     | 689.57      | 2083.94     | 2357.21     | 221.46      | 3751.36     | 4057.24     | 5273.94     | 2729.86     | 1457.77     | 2608.37     | 1124.00     | 2993.66     | 2838.17     | 1102.88     | 1789.16     | 18.7454.84               |
| <b>Indole-3-lactic acid</b>  | 109880.08 | 191667.37    | 164274.04   | 114797.70   | 158719.97   | 104955.94   | 107285.85   | 195445.79   | 120897.78   | 122860.58   | 139677.90   | 72153.20    | 194254.56   | 100532.96   | 153304.50   | 176384.90   | 116963.01   | 155256.46   | 86828.45    | 19.0061.29               |
| <b>3-Hexenedioic acid</b>    | 8478.80   | 8975.09      | 4314.46     | 8231.04     | 9940.44     | 10094.25    | 12977.94    | 9082.81     | 6143.99     | 7740.29     | 6495.52     | 13800.69    | 9667.49     | 8315.07     | 14173.14    | 7282.89     | 8769.20     | 15573.61    | 12229.00    | 19.8161.29               |

**Table E2.** List of identified metabolites in fresh medium and spent medium from cultures of MS-5 cells in normoxia and hypoxia. Samples are labeled as MS-5 cells normoxia (N) or hypoxia (H), and day 4 and FM is fresh medium. 13C3-Lactate and 13C5-15N-Glutamic acid were internal standards

| Compounds                                                   | FM       | MS-5 N-1  | MS-5 N-2  | MS-5 N-3  | MS-5 N-4  | MS-5 H-1  | MS-5 H-2  | MS-5 H-3  | MS-5 H-4  |
|-------------------------------------------------------------|----------|-----------|-----------|-----------|-----------|-----------|-----------|-----------|-----------|
| Citraconic acid                                             | 344865   | 230074    | 183820    | 196185    | 168106    | 173963    | 417016    | 220013    | 229614    |
| Serine                                                      | 255115   | 36697     | 34350     | 89979     | 29054     | 72570     | 101651    | 32208     | 213245    |
| Norvaline                                                   | 8654780  | 15063039  | 16144215  | 15216125  | 16439547  | 14375248  | 9914960   | 16376614  | 9556454   |
| L-Alloisoleucine/Leucine/Norleucine                         | 91303814 | 125815719 | 137714479 | 134885982 | 145011672 | 128365769 | 105738158 | 136513022 | 104808036 |
| Asparagine                                                  | 326601   | 408185    | 418182    | 254337    | 305686    | 281927    | 320335    | 454044    | 216889    |
| Isoleucine                                                  | 91512488 | 124949549 | 137738713 | 133820174 | 144056991 | 129525205 | 105253080 | 138342315 | 105083534 |
| Valine                                                      | 9839649  | 16959422  | 18454579  | 17121724  | 18461669  | 16564824  | 11366268  | 18708583  | 10804205  |
| Glucose                                                     | 6551167  | 3346103   | 3373447   | 4003075   | 3639667   | 4201892   | 6194651   | 3646433   | 6666389   |
| Sorbitol                                                    | 700797   | 943380    | 944501    | 982909    | 896289    | 952672    | 817725    | 847672    | 332699    |
| Fumarate                                                    | 217146   | 105440    | 81949     | 94726     | 69279     | 69262     | 268919    | 90915     | 133267    |
| Glyoxylic acid                                              | 68503    | 34895     | 32414     | 49688     | 36058     | 40757     | 63686     | 37086     | 70726     |
| Homoserine/Threonine                                        | 6761510  | 8142612   | 8189782   | 7876716   | 9005973   | 7912996   | 6989180   | 8451411   | 7714452   |
| Threonine                                                   | 6761510  | 8142612   | 8189782   | 7876716   | 9005973   | 7912996   | 6989180   | 8451411   | 7714452   |
| Methionine                                                  | 3301966  | 3908536   | 4536153   | 4366010   | 4661934   | 4147131   | 3179859   | 4287057   | 3513780   |
| Sarcosine                                                   | 2332677  | 1623577   | 1674786   | 1228896   | 1710722   | 1401988   | 2988195   | 1621848   | 2320729   |
| Alanine                                                     | 2412726  | 1627287   | 1774936   | 1382773   | 1757850   | 1332217   | 3007805   | 1719816   | 2091095   |
| Kynurenine                                                  | 28280    | 61747     | 61461     | 28525     | 79746     | 31024     | 8109      | 63303     | 44378     |
| Phosphocreatine                                             | 47160    | 46544     | 31873     | 101436    | 29555     | 17877     | 26516     | 19383     | 34112     |
| Dihydroxyacetone                                            | 97210    | 96527     | 137587    | 186487    | 82682     | 114245    | 155858    | 102739    | 168532    |
| 4-Methyl-2-oxopentanoic acid/Ketoleucine/<br>Ketoisoleucine | 439159   | 288226    | 247748    | 288022    | 250974    | 245966    | 601131    | 294186    | 303727    |
| Isobutyric acid                                             | 253586   | 116557    | 115788    | 213431    | 92882     | 195347    | 362268    | 149938    | 270637    |
| 4-Methylvaleric acid/Hexanoic acid                          | 2020782  | 866647    | 803390    | 852327    | 673344    | 318080    | 2329568   | 926745    | 1297160   |
| 2-Methylbutyric acid/Valeric acid                           | 757669   | 192595    | 180958    | 133994    | 196198    | 114975    | 332314    | 178888    | 558477    |
| Hydroxyproline                                              | 1026192  | 656909    | 686745    | 715299    | 913816    | 724083    | 1086978   | 766991    | 1280966   |
| Mannose                                                     | 1950082  | 1160799   | 924553    | 1355667   | 1082742   | 1336172   | 2033806   | 1009843   | 1915233   |
| TMAO                                                        | 391453   | 298973    | 418393    | 304567    | 443572    | 402230    | 299403    | 349502    | 458580    |
| Glutamine                                                   | 7446374  | 30171003  | 28826677  | 35620219  | 27282200  | 34178207  | 14801462  | 31196434  | 6419593   |
| 2-Aminoadipic acid                                          | 28353    | 25728     | 28436     | 36612     | 40905     | 34537     | 41177     | 27254     | 37053     |
| alpha-Ketoisovaleric acid/Maleic acid                       | 306965   | 165498    | 120581    | 157262    | 111375    | 112904    | 369737    | 135526    | 204067    |
| 13C3-Lactate                                                | 721215   | 636742    | 747276    | 739351    | 653771    | 694705    | 722984    | 711991    | 909618    |
| Lactate                                                     | 2285015  | 10176171  | 10723490  | 10377737  | 9756358   | 10752694  | 3985733   | 10773833  | 1254662   |
| Adipic acid                                                 | 45630    | 264137    | 345568    | 404055    | 119120    | 471901    | 132311    | 346754    | 94734     |
| Methylguanidine                                             | 186753   | 213993    | 196478    | 212756    | 215020    | 205846    | 176125    | 201989    | 181817    |
| Pyridoxine                                                  | 1702216  | 2260621   | 1779762   | 2083706   | 2367273   | 2195595   | 2356701   | 2076982   | 1211614   |
| 9-Octadecynoic acid                                         | 128831   | 54594     | 42876     | 65215     | 57665     | 48041     | 128132    | 56079     | 116650    |
| HIAA                                                        | 15832    | 14911     | 21146     | 9911      | 26253     | 9337      | 9177      | 19027     | 16031     |
| 2-Aminobutyric acid                                         | 405000   | 5865445   | 5347933   | 4870469   | 5960468   | 5260179   | 1173402   | 5748658   | 907191    |
| Glutamic acid                                               | 2741892  | 1601579   | 1598607   | 1199201   | 1767108   | 1217954   | 2421655   | 1849575   | 1953610   |
| 3-Methyl-2-oxovaleric acid                                  | 5501524  | 3334165   | 3062982   | 3735959   | 3166060   | 3120920   | 7896909   | 3765074   | 4091919   |
| Histamine                                                   | 59267    | 42528     | 43373     | 50721     | 26201     | 53469     | 64151     | 49919     | 51088     |
| 5-Aminolevulinic acid                                       | 962045   | 666043    | 688408    | 718727    | 910486    | 729690    | 1087159   | 773566    | 1241384   |
| Tryptophan                                                  | 3085788  | 3353981   | 4081384   | 4313606   | 4842866   | 3893613   | 2788486   | 4334400   | 2435940   |
| Pipecolic acid                                              | 696450   | 405514    | 510359    | 361988    | 497564    | 379658    | 627118    | 463132    | 621015    |

(continued on next page)

Table E2 (Continued)

| Compounds                                             | FM       | MS-5 N-1 | MS-5 N-2 | MS-5 N-3 | MS-5 N-4 | MS-5 H-1 | MS-5 H-2 | MS-5 H-3 | MS-5 H-4 |
|-------------------------------------------------------|----------|----------|----------|----------|----------|----------|----------|----------|----------|
| 3-hydroxykynurenine                                   | 5205     | 7745     | 3438     | 2200     | 3634     | 3447     | 4993     | 1924     | 3656     |
| 2/3-Aminoisobutyric acid/Dimethylglycine              | 254022   | 3371001  | 2911227  | 2244270  | 4215792  | 2846113  | 716846   | 3640764  | 81698    |
| Nicotinamide                                          | 1377661  | 1276317  | 1283416  | 1331132  | 1589386  | 1401913  | 1278413  | 1495636  | 1096639  |
| Myristic acid                                         | 165063   | 108932   | 114671   | 138277   | 113915   | 110623   | 121871   | 72260    | 175766   |
| Uridine                                               | 3519     | 1680     | 2654     | 1543     | 2065     | 1570     | 948      | 2492     | 1504     |
| L-(+)-Arabinose                                       | 192325   | 76964    | 75204    | 110953   | 76617    | 100321   | 153320   | 86124    | 179269   |
| Quinolinic acid                                       | 49296    | 41873    | 51680    | 53035    | 50106    | 51509    | 54767    | 49611    | 53261    |
| Aspartate                                             | 69504    | 50232    | 39813    | 30043    | 44155    | 27122    | 81511    | 34122    | 53129    |
| Stearic acid                                          | 2323052  | 1618297  | 1332232  | 2428447  | 1489808  | 1814716  | 2222668  | 1487340  | 2482501  |
| Phenylalanine                                         | 23121771 | 23787647 | 21992085 | 23653625 | 22125567 | 22220306 | 22152969 | 22346772 | 19887876 |
| Dulcitol                                              | 879381   | 1000104  | 1019436  | 1054806  | 984396   | 1020143  | 974847   | 1083979  | 356535   |
| Glycine                                               | 161287   | 105506   | 98790    | 90936    | 112907   | 96678    | 139288   | 105319   | 129434   |
| L-(-)-Arabitol                                        | 55812    | 43224    | 46327    | 53034    | 43282    | 56648    | 66414    | 48600    | 51613    |
| Phenylpyruvic acid                                    | 52375    | 9606     | 6948     | 7179     | 9294     | 6317     | 30853    | 7833     | 29571    |
| 3-Phenyllactic acid                                   | 45062    | 85586    | 61888    | 24420    | 76601    | 27020    | 38007    | 82500    | 26042    |
| Isovaleric acid                                       | 511260   | 240812   | 208830   | 381923   | 229659   | 392227   | 434829   | 259172   | 533945   |
| Malate                                                | 951474   | 1101513  | 1323446  | 1137268  | 1354858  | 941527   | 1020125  | 1468236  | 874129   |
| Nonadecanoic acid                                     | 130677   | 92992    | 110679   | 139506   | 95981    | 102992   | 104069   | 61861    | 159727   |
| D-Mannitol                                            | 252954   | 326663   | 312169   | 307139   | 343536   | 355788   | 300036   | 325003   | 96323    |
| 4-Hydroxyphenylacetic acid/Mandelic acid              | 21000    | 6666     | 6861     | 7373     | 5834     | 6526     | 25264    | 9436     | 13363    |
| 2-Deoxycytidine                                       | 88466    | 16719    | 15058    | 57325    | 10067    | 49517    | 23800    | 11882    | 231067   |
| 6-Methyl-DL-Tryptophan                                | 46154    | 22820    | 25784    | 30597    | 27615    | 27513    | 42449    | 27408    | 55271    |
| Adonitol                                              | 29038    | 19927    | 20074    | 24204    | 19104    | 24556    | 31447    | 21199    | 21220    |
| Oxaloacetic acid                                      | 53799    | 77218    | 105497   | 75915    | 54721    | 96620    | 89118    | 96430    | 51895    |
| 2-Hydroxyphenylacetic acid/3-Hydroxyphenylacetic acid | 22772    | 6607     | 6786     | 6850     | 5971     | 6426     | 24724    | 9602     | 13496    |
| Pentadecanoic acid                                    | 202665   | 123782   | 74273    | 241326   | 88380    | 86708    | 122815   | 72636    | 212403   |
| Metanephrine                                          | 419614   | 383269   | 394690   | 478225   | 475766   | 399992   | 581682   | 408814   | 327362   |
| Ribose                                                | 29252    | 71107    | 80063    | 75982    | 61943    | 82767    | 40601    | 70987    | 16015    |
| Caprylic acid                                         | 129602   | 71502    | 110594   | 78708    | 124455   | 122847   | 149083   | 112130   | 140255   |
| Xylose                                                | 29252    | 71690    | 80253    | 76055    | 61938    | 83364    | 39956    | 71903    | 16134    |
| Pyroglutamic acid                                     | 3725319  | 3076119  | 3883461  | 3206949  | 4176584  | 2987963  | 3444940  | 3919170  | 4460492  |
| Normetanephrine                                       | 59079    | 29168    | 27585    | 22504    | 28978    | 19821    | 64931    | 29709    | 33138    |
| Succinate                                             | 7344974  | 5218342  | 5279109  | 5461562  | 5524063  | 5262155  | 8013218  | 5534803  | 7154703  |
| Ethylmalonic acid                                     | 4794     | 2605     | 3519     | 4237     | 3914     | 3307     | 2993     | 2743     | 5969     |
| Creatinine                                            | 1034690  | 940259   | 838853   | 928380   | 972753   | 960547   | 1082261  | 878649   | 755089   |
| Creatine                                              | 4166732  | 4871985  | 4923835  | 4340364  | 6022525  | 5802456  | 5680648  | 5167608  | 6206867  |
| Trehalose                                             | 16572    | 9553     | 8988     | 13980    | 5464     | 14096    | 13040    | 6231     | 3420     |
| Methylmalonic acid                                    | 7353523  | 5222372  | 5279019  | 5454792  | 5522345  | 5260750  | 8013218  | 5535630  | 7157598  |
| Lauric acid                                           | 194409   | 111715   | 130115   | 115042   | 128113   | 94333    | 147301   | 106571   | 166463   |
| beta-Hydroxyisovaleric acid                           | 3580     | 23771    | 10468    | 4709     | 11700    | 4479     | 3186     | 11412    | 1177     |
| Imidazole                                             | 28333    | 31583    | 42119    | 22913    | 80464    | 52467    | 21985    | 29882    | 34605    |
| Heptadecanoic acid                                    | 436232   | 173716   | 526068   | 264564   | 502029   | 573517   | 191011   | 284832   | 350022   |
| Xylitol                                               | 30865    | 25919    | 26543    | 31345    | 28646    | 31097    | 37490    | 31857    | 24718    |
| Ornithine                                             | 240730   | 228502   | 198663   | 143312   | 233752   | 147634   | 272720   | 209598   | 257069   |
| Leucic acid                                           | 57222    | 106915   | 118742   | 48237    | 97278    | 48803    | 101040   | 120078   | 39578    |

(continued on next page)

Table E2 (Continued)

| Compounds                          | FM       | MS-5 N-1 | MS-5 N-2 | MS-5 N-3 | MS-5 N-4 | MS-5 H-1 | MS-5 H-2 | MS-5 H-3 | MS-5 H-4 |
|------------------------------------|----------|----------|----------|----------|----------|----------|----------|----------|----------|
| Benzoic acid                       | 146088   | 170345   | 146849   | 47399    | 125701   | 51075    | 55028    | 143524   | 161513   |
| Phenylacetic acid                  | 50534    | 45293    | 47197    | 28979    | 57228    | 44212    | 36762    | 50491    | 61213    |
| Cytidine                           | 138354   | 103365   | 99088    | 92659    | 153927   | 88861    | 67026    | 107448   | 82247    |
| Palmitic acid                      | 2774909  | 1779001  | 1568277  | 1792342  | 1996430  | 1918529  | 2006991  | 1512900  | 2538182  |
| Acetylcarnitine                    | 3219482  | 4162658  | 4154382  | 4455694  | 3607602  | 5171927  | 4004118  | 3787427  | 2962943  |
| Tyrosine                           | 2712569  | 2609585  | 2923543  | 2599089  | 3273800  | 3046439  | 2626324  | 3033433  | 1887264  |
| Cystine                            | 373612   | 461111   | 401687   | 452445   | 588658   | 504564   | 497941   | 394192   | 311626   |
| 4-Pyridoxic acid                   | 43074    | 8683     | 8351     | 7472     | 10755    | 9278     | 65366    | 9312     | 15864    |
| 4-Hydroxybenzaldehyde              | 78659    | 8163     | 11157    | 9575     | 7079     | 6488     | 40841    | 10401    | 32337    |
| Glycocyamine                       | 64267    | 69498    | 64407    | 77074    | 62737    | 72895    | 65243    | 73913    | 46010    |
| pregnenolone sulfate               | 3163     | 2560     | 6570     | 2266     | 1851     | 2203     | 2994     | 2108     | 3312     |
| 13C5-15N-Glutamic acid             | 1280394  | 1448063  | 1150207  | 1192599  | 1305559  | 1356009  | 1174642  | 1210580  | 1263436  |
| Picolinic acid                     | 38898    | 42128    | 43119    | 42317    | 45607    | 39227    | 43740    | 42789    | 31832    |
| Lysine                             | 2558919  | 3193173  | 2581842  | 2543576  | 2930707  | 2661670  | 2703349  | 2746108  | 2170591  |
| 3-Methyladipic acid                | 8691     | 6259     | 4339     | 5750     | 5701     | 5121     | 7454     | 5295     | 8168     |
| Betaine                            | 21175156 | 15556778 | 19637757 | 17259630 | 18271990 | 16262356 | 19324180 | 17610780 | 16305541 |
| 2-Pyrrolidinone                    | 2719     | 1880     | 1820     | 2611     | 2193     | 2336     | 2510     | 1878     | 2258     |
| alpha-KG                           | 877429   | 561329   | 612823   | 693953   | 738184   | 681156   | 775252   | 702740   | 1010848  |
| Carnosine                          | 98291    | 119211   | 99215    | 91290    | 99862    | 93639    | 120792   | 89985    | 73767    |
| Arginine                           | 19372941 | 24842693 | 21002238 | 21820792 | 26258623 | 24269860 | 22428136 | 21477142 | 15411805 |
| Citrulline                         | 112371   | 128242   | 156096   | 179618   | 73573    | 206783   | 193483   | 139351   | 83048    |
| Fructose/Galactose                 | 1331050  | 16040520 | 15205022 | 13607011 | 15698625 | 14144484 | 3264949  | 14804741 | 477682   |
| N-Acetylmuramic Acid               | 16966    | 2639     | 1672     | 3472     | 1869     | 3563     | 20171    | 1855     | 13387    |
| D-(+)-Cellobiose                   | 42993    | 21500    | 23619    | 75609    | 13037    | 85759    | 19138    | 19963    | 45052    |
| Lactose                            | 42585    | 23266    | 21637    | 67080    | 12482    | 87852    | 18954    | 20177    | 43099    |
| Erythrose                          | 2634     | 2580     | 2910     | 3471     | 3152     | 2817     | 3731     | 3198     | 2247     |
| malonic acid                       | 64233    | 7764     | 7898     | 28571    | 9215     | 32779    | 47391    | 8546     | 45422    |
| Levulinic acid                     | 141080   | 5537     | 6284     | 80264    | 4409     | 85930    | 185895   | 10292    | 113055   |
| Urocanic acid                      | 366557   | 309608   | 270056   | 232024   | 439126   | 263759   | 207452   | 268601   | 49167    |
| 4-Imidazoleacetic acid             | 54913    | 55707    | 55099    | 43301    | 54317    | 43539    | 69294    | 49235    | 65826    |
| Carnitine                          | 3790712  | 3029504  | 2449149  | 2269357  | 2962291  | 2460366  | 3431502  | 2799358  | 2474530  |
| 2HG                                | 62800    | 86690    | 76374    | 65150    | 83741    | 61935    | 63380    | 85781    | 56142    |
| Cytosine                           | 92609    | 55174    | 61095    | 46032    | 80501    | 47633    | 39568    | 40027    | 57495    |
| Histidine                          | 4215148  | 3730253  | 1804909  |          | 1045772  | 3988274  | 5579941  | 2602455  | 2580622  |
| R5P                                | 67609    | 127026   | 132011   | 72750    | 105527   | 85745    | 83029    | 142372   | 57149    |
| Glyceric acid                      | 21826    | 12274    | 15146    | 14140    | 11981    | 12374    | 13565    | 14028    | 20484    |
| 2-hydroxybutyric acid/Malonic acid | 8131     | 5298     | 4019     | 9251     | 3805     | 11696    | 11165    | 4361     | 5065     |
| Pantothenic acid                   | 1481478  | 1681725  | 1527000  | 1780311  | 1700868  | 1410302  | 2241615  | 1441138  | 1275849  |
| 6-Hydroxynicotinic acid            | 18802    | 21262    | 19379    | 16522    | 26496    | 18180    | 14926    | 19532    | 6501     |
| Proline                            | 5967145  | 15524093 | 14198086 | 8804861  | 16312269 | 10075192 | 7953585  | 16346920 | 3441861  |
| D-Xyloic Acid (Lithium Salt)       | 313377   | 299597   | 274094   | 241374   | 467705   | 271699   | 292350   | 279549   | 211294   |
| N-Acetyl-D-galactosamine           | 63250    | 19058    | 22448    | 22124    | 27667    | 18387    | 56075    | 19586    | 29198    |
| 2-Methylglutaric acid              | 381144   | 213107   | 212659   | 284891   | 294678   | 272960   | 306388   | 270909   | 353304   |
| 4-Hydroxy-3-methylbenzoic acid     | 5549     | 1635     | 1674     | 2584     | 1350     | 1184     | 6476     | 1716     | 3517     |
| 2-Hydroxybenzoic acid              | 11259    | 12064    | 13885    | 11345    | 11266    | 6311     | 10354    | 11915    | 16761    |

(continued on next page)



**Table E2** (Continued)

| Compounds               | FM     | MS-5 N-1 | MS-5 N-2 | MS-5 N-3 | MS-5 N-4 | MS-5 H-1 | MS-5 H-2 | MS-5 H-3 | MS-5 H-4 |
|-------------------------|--------|----------|----------|----------|----------|----------|----------|----------|----------|
| Acetyl-L-glutamine      | 25969  | 26843    | 23581    | 14855    | 29780    | 15359    | 53306    | 25320    | 12904    |
| Capric acid             | 104630 | 68908    | 100690   | 48836    | 104082   | 84959    | 94097    | 85841    | 127677   |
| Adenosyl-L-homocysteine | 29858  | 15077    | 13103    | 6234     | 5081     | 9835     | 34175    | 22748    | 3664     |
| N-Acetylneuraminic acid | 23372  | 18456    | 22346    | 18403    | 20903    | 19946    | 25995    | 21367    | 18684    |

**A****CD34 cells**  
(% of Lin<sup>-</sup>/Live cells)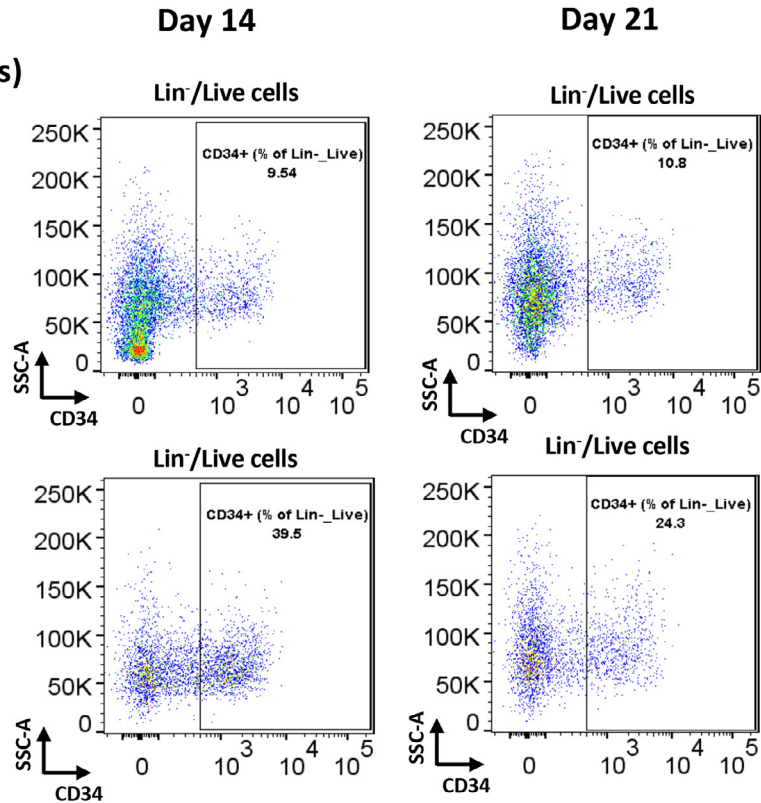**B****CD133+ cells**  
(% of Lin<sup>-</sup>/Live cells)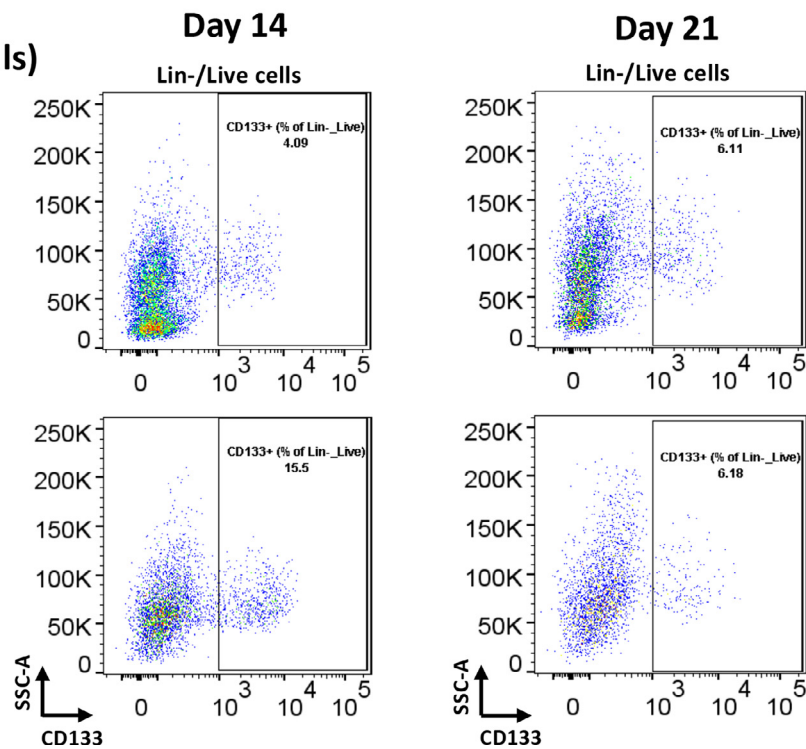

**Figure E2. Hypoxia inhibits expansion of the stem and progenitor cells.** Representative scatter plots for CD34<sup>+</sup> (A) and CD133<sup>+</sup> (B) cells in cultures incubated in normoxia or hypoxia. Plots for immunophenotyping performed on days 14 and 21 are shown.

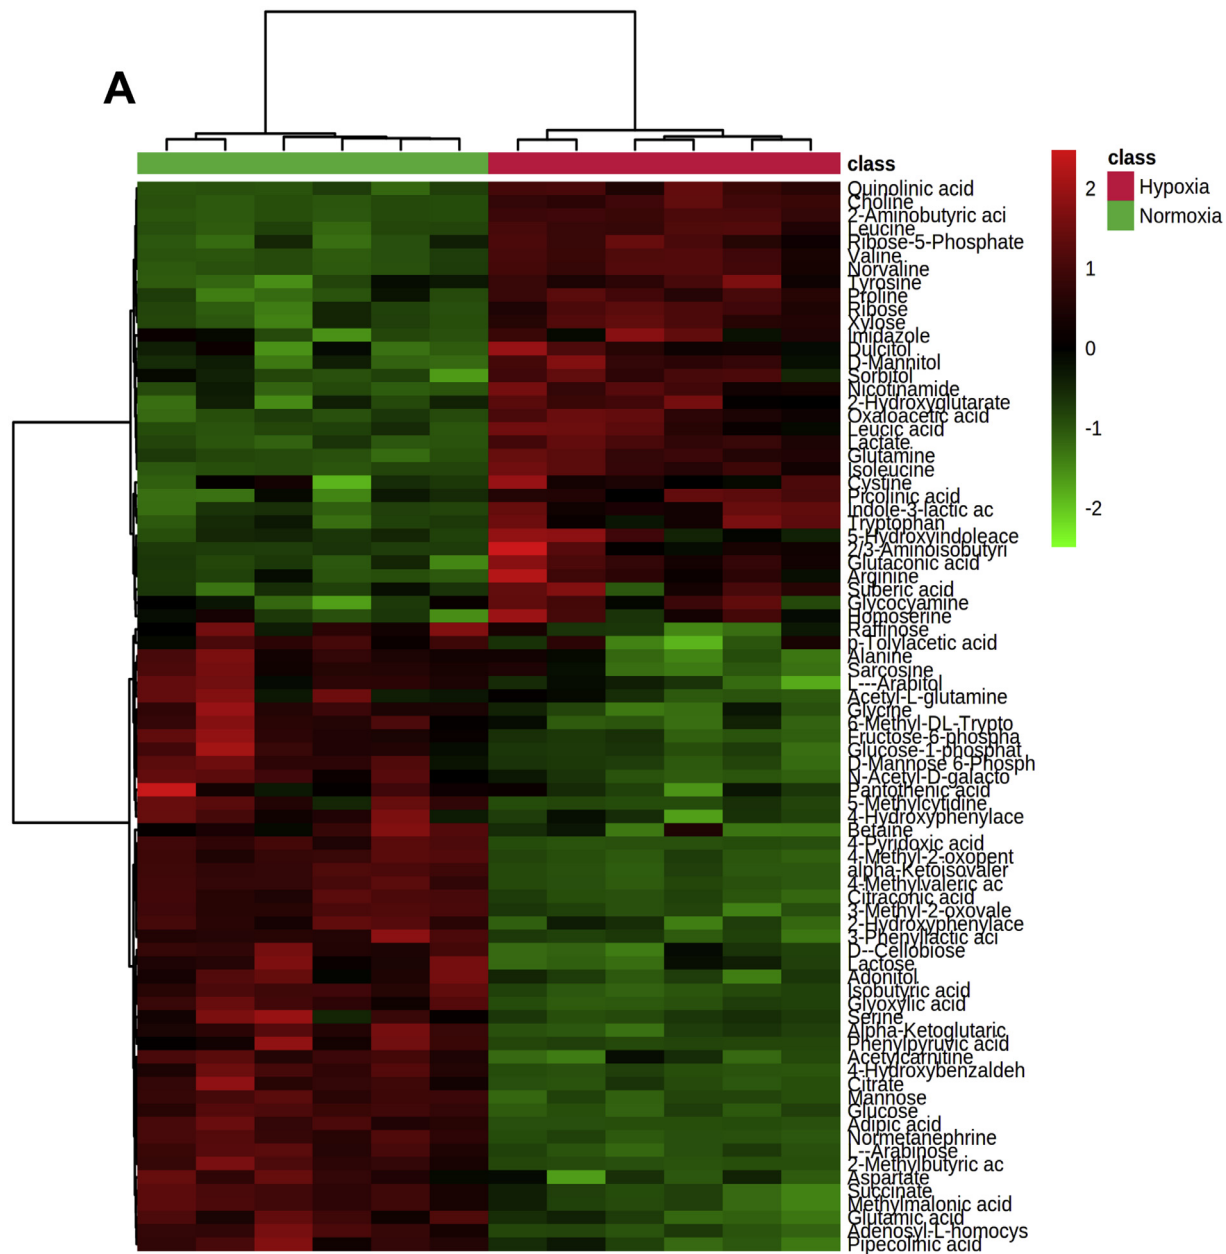

**Figure E3. Hypoxia causes a metabolic shift in the CD34<sup>+</sup> cells.** Metabolite profiling comparing levels in spent medium of cultures incubated in normoxia or hypoxia to levels in fresh medium. (A) Heat map representation of fold change in metabolites in hypoxia or normoxia. (B) Graph of fold change in metabolites that are significantly different ( $p < 0.05$ ) between medium from normoxia and hypoxia cultures. Statistical analysis was performed in MetaboAnalyst.

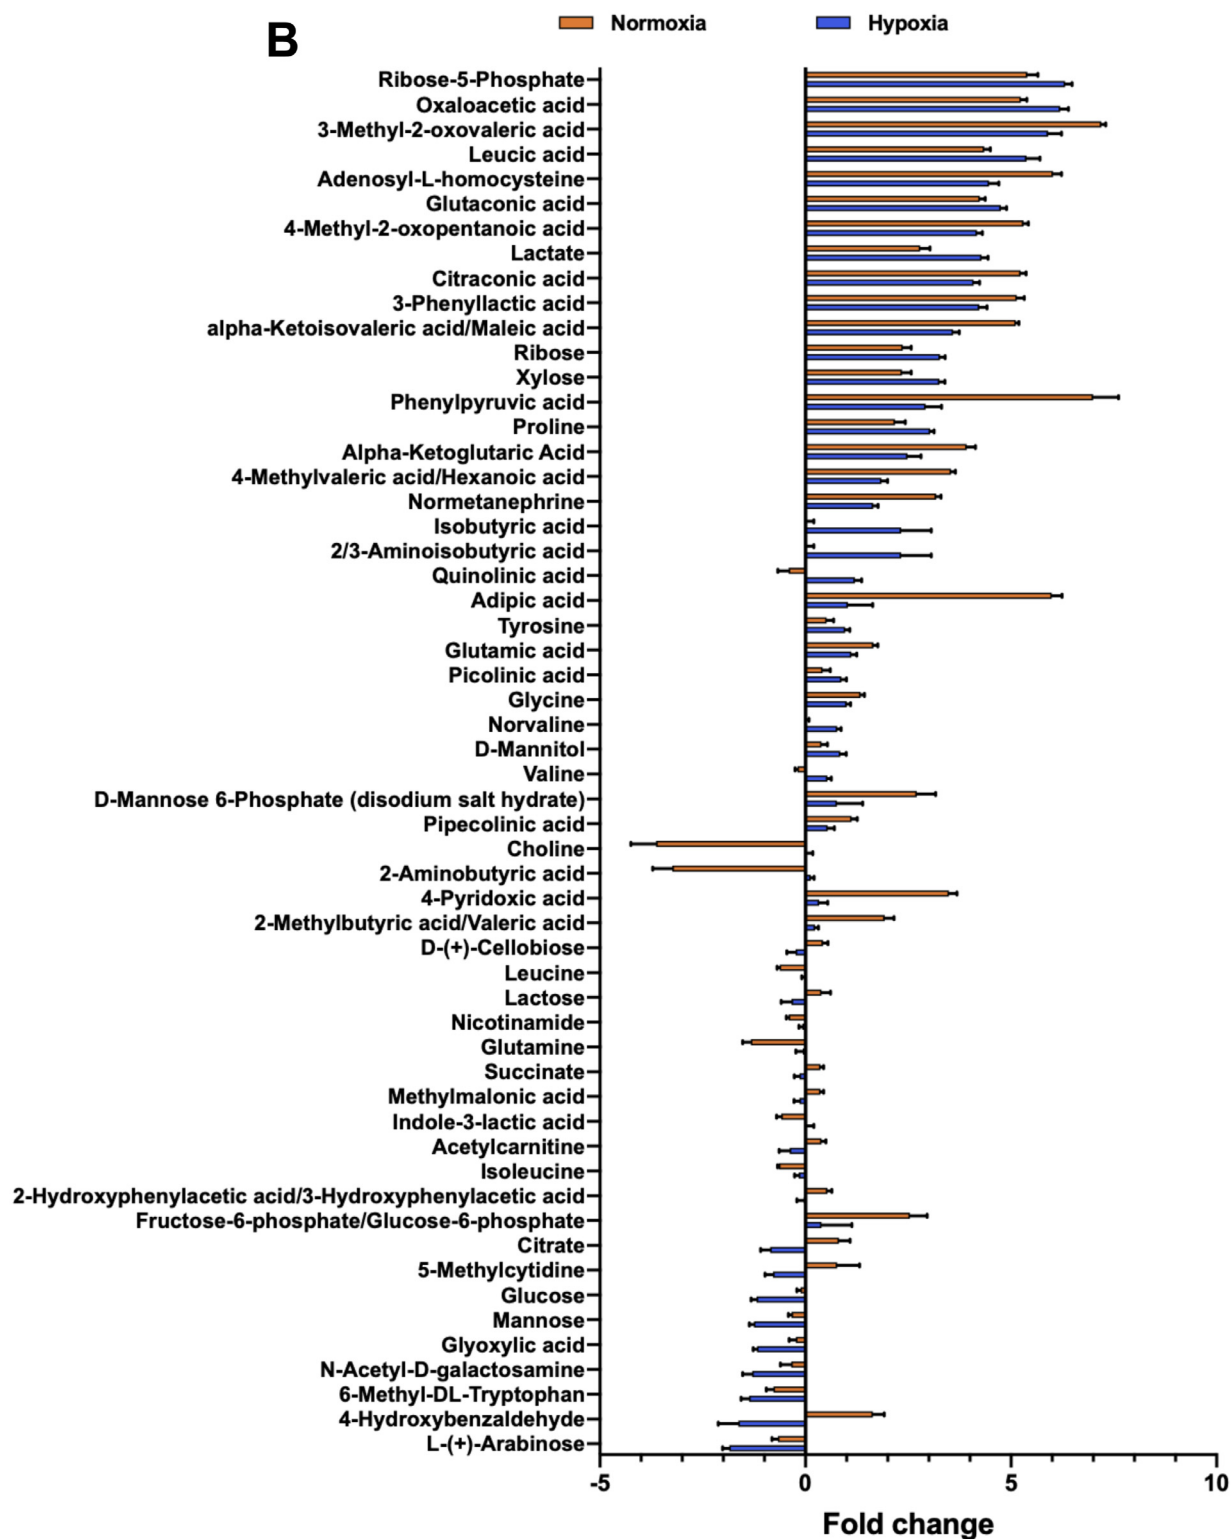

Figure E3. Continued.

**Table E3.** List of metabolites that significantly changed in the spent medium of CD34+ co-cultures relative to fresh medium in normoxia.

| Sample ID                                             | Normoxia   | P-value    |
|-------------------------------------------------------|------------|------------|
| Choline                                               | 0.08624623 | 5.4059E-08 |
| 2-Aminobutyric acid                                   | 0.11053036 | 2.6427E-07 |
| Serine                                                | 0.25962546 | 4.7162E-05 |
| Glutamine                                             | 0.40057862 | 0.00013069 |
| Methionine                                            | 0.47143679 | 0.00059151 |
| 9-Octadecynoic acid                                   | 0.55805333 | 7.7938E-05 |
| Cytidine                                              | 0.56613052 | 0.04104889 |
| 6-Methyl-DL-Tryptophan                                | 0.58536351 | 0.00072776 |
| Citrulline                                            | 0.60995152 | 0.00021856 |
| L-(+)-Arabinose                                       | 0.62982558 | 0.00028602 |
| Isoleucine                                            | 0.63789562 | 8.2889E-06 |
| Leucine                                               | 0.64657272 | 2.6769E-06 |
| Taurine                                               | 0.65313315 | 0.01374881 |
| Tryptophan                                            | 0.65634056 | 0.00555253 |
| Indole-3-lactic acid                                  | 0.66639276 | 0.00022387 |
| Ornithine                                             | 0.69390987 | 0.03363796 |
| 5-Hydroxyindoleacetic acid                            | 0.70674765 | 0.0280946  |
| Nicotinamide                                          | 0.7549103  | 6.8709E-05 |
| Mannose                                               | 0.79086512 | 0.00071692 |
| Pyridoxine                                            | 0.80058708 | 0.01909436 |
| Valine                                                | 0.87160887 | 0.00280845 |
| Carnosine                                             | 1.22252177 | 0.00913645 |
| Sorbitol                                              | 1.27237754 | 0.04396603 |
| Methylmalonic acid                                    | 1.28987857 | 0.00524438 |
| Succinate                                             | 1.2902666  | 0.00513616 |
| Acetylcarnitine                                       | 1.31383686 | 0.00400842 |
| D-Mannitol                                            | 1.31597634 | 0.01692835 |
| Picolinic acid                                        | 1.34487266 | 0.0393333  |
| D-(+)-Cellobiose                                      | 1.35118414 | 0.00699011 |
| Tyrosine                                              | 1.43871019 | 0.01264926 |
| 2-Hydroxyphenylacetic acid/3-Hydroxyphenylacetic acid | 1.45426804 | 0.03006403 |
| Phenylacetic acid                                     | 1.47129331 | 0.00271879 |
| 4-Hydroxyphenylacetic acid/Mandelic acid              | 1.50793639 | 0.02416206 |
| L-(-)-Arabitol                                        | 1.60666813 | 0.00116481 |
| 2-Hydroxyglutarate                                    | 1.71990246 | 0.00850632 |
| Citrate                                               | 1.78319467 | 0.02597473 |
| p-Tolylacetic acid/4-Ethylbenzoic acid                | 1.84870081 | 0.00782083 |
| Xylitol                                               | 1.90319347 | 0.001077   |
| Pipecolinic acid                                      | 2.18506991 | 0.0002713  |
| 2-Hydroxybenzoic acid                                 | 2.32919609 | 0.0116719  |
| Glycine                                               | 2.53274825 | 4.2477E-05 |
| 5-Aminolevulinic acid                                 | 2.71222365 | 0.04314563 |
| Hydroxyproline                                        | 2.88669912 | 0.0352636  |
| Malate                                                | 3.04695456 | 6.9282E-05 |
| Glutamic acid                                         | 3.14661609 | 2.3892E-05 |
| 4-Hydroxybenzaldehyde                                 | 3.17036881 | 0.00332875 |
| Dihydroxyacetone                                      | 3.51964799 | 0.00062304 |
| 2-Methylbutyric acid/Valeric acid                     | 3.84318152 | 0.00087707 |
| Aspartate                                             | 4.11605422 | 0.0001192  |
| Benzoic acid                                          | 4.20129402 | 0.0087986  |
| 4-Imidazoleacetic acid                                | 4.4127849  | 0.00137074 |
| Proline                                               | 4.58673842 | 0.00103968 |
| Xylose                                                | 5.1464227  | 0.00032129 |
| Ribose                                                | 5.1930513  | 0.00026431 |
| Aconitic acid                                         | 5.36461594 | 0.00092318 |
| Fructose-6-phosphate/Glucose-6-phosphate              | 6.02771494 | 0.00964743 |
| D-Mannose 6-Phosphate (disodium salt hydrate)         | 6.78645897 | 0.00546105 |
| Lactate                                               | 7.00522771 | 0.00052434 |
| Alanine                                               | 7.27976769 | 0.00011906 |
| Sarcosine                                             | 7.33286294 | 8.5226E-05 |
| Glucose-1-phosphate                                   | 7.94575994 | 0.0136457  |

(continued)

Table E3 (Continued)

| Sample ID                             | Normoxia   | P-value    |
|---------------------------------------|------------|------------|
| Normetanephrine                       | 9.08467573 | 6.4458E-06 |
| 4-Pyridoxic acid                      | 11.3321011 | 8.1698E-05 |
| 4-Methylvaleric acid/Hexanoic acid    | 11.6683857 | 2.8019E-06 |
| Acetyl-L-glutamine                    | 12.1510314 | 0.02623156 |
| Alpha-Ketoglutaric Acid               | 15.2791014 | 0.00019053 |
| Glutaconic acid                       | 18.9424254 | 6.7249E-06 |
| Suberic acid                          | 19.6253654 | 9.0371E-06 |
| Leucic acid                           | 20.4619665 | 2.3124E-05 |
| AMP                                   | 22.827629  | 0.01670402 |
| alpha-Ketoisovaleric acid/Maleic acid | 34.664999  | 3.664E-07  |
| 3-Phenyllactic acid                   | 35.5146983 | 7.1519E-05 |
| Citraconic acid                       | 37.8471008 | 6.0766E-06 |
| Oxaloacetic acid                      | 38.0278722 | 1.0497E-05 |
| 4-Methyl-2-oxopentanoic acid          | 39.6345225 | 2.9525E-06 |
| Ribose-5-Phosphate                    | 42.6646289 | 0.00037718 |
| Adipic acid                           | 64.3843976 | 0.00029006 |
| Adenosyl-L-homocysteine               | 65.4284844 | 0.00011725 |
| Isobutyric acid                       | 123.218488 | 2.6296E-05 |
| Asparagine                            | 131.064251 | 6.5166E-05 |
| Phenylpyruvic acid                    | 137.814423 | 0.02061056 |
| 3-Methyl-2-oxovaleric acid            | 147.044285 | 1.8707E-06 |

**Table E4.** List of metabolites that significantly changed in the spent medium of CD34+ co-cultures relative to fresh medium in hypoxia.

| Sample ID                             | Hypoxia    | P-value    |
|---------------------------------------|------------|------------|
| Serine                                | 0.11277691 | 1.5891E-09 |
| 2-Deoxycytidine                       | 0.21484877 | 1.5247E-05 |
| L-(+)-Arabinose                       | 0.27824692 | 3.1156E-07 |
| Adonitol                              | 0.33238795 | 0.00109115 |
| 4-Hydroxybenzaldehyde                 | 0.33945454 | 0.00274186 |
| 9-Octadecynoic acid                   | 0.36544348 | 0.00693911 |
| 6-Methyl-DL-Tryptophan                | 0.3884956  | 3.5975E-05 |
| N-Acetyl-D-galactosamine              | 0.4116632  | 0.02000297 |
| Mannose                               | 0.42094444 | 6.3108E-07 |
| Glucose                               | 0.4401434  | 2.0746E-05 |
| Glyoxylic acid                        | 0.44213528 | 2.8911E-07 |
| Methionine                            | 0.47481453 | 0.00199821 |
| Cytosine                              | 0.5489073  | 0.00152124 |
| Citrate                               | 0.55743666 | 0.00087295 |
| Cytidine                              | 0.56298769 | 0.00309838 |
| 5-Methylcytidine                      | 0.58287937 | 0.00205505 |
| Citrulline                            | 0.71968777 | 0.02150607 |
| Pyridoxine                            | 0.78694823 | 0.01571151 |
| Raffinose                             | 0.83550597 | 0.04237544 |
| 2-Methylbutyric acid/Valeric acid     | 1.17583997 | 0.038051   |
| L-(-)-Arabitol                        | 1.29113539 | 0.03150266 |
| NADPH                                 | 1.33720413 | 0.00433504 |
| Imidazole                             | 1.37023407 | 0.02099061 |
| Threonine                             | 1.42350906 | 0.05050989 |
| Valine                                | 1.45223769 | 0.00055341 |
| Pipecolic acid                        | 1.46093576 | 0.00984419 |
| Phenylacetic acid                     | 1.49159593 | 0.00550488 |
| Xylitol                               | 1.64756159 | 0.00707642 |
| Sorbitol                              | 1.67959611 | 0.00215125 |
| Dulcitol                              | 1.70224612 | 0.00588917 |
| Norvaline                             | 1.70744767 | 0.00041207 |
| D-Mannitol                            | 1.80364422 | 0.00106991 |
| Putrescine                            | 1.82263836 | 0.0357772  |
| Picolinic acid                        | 1.8331408  | 0.00044674 |
| Tyrosine                              | 1.95855637 | 0.00018943 |
| Glycine                               | 2.00430474 | 0.00012304 |
| 2-Hydroxybenzoic acid                 | 2.06568555 | 0.02963327 |
| Glutamic acid                         | 2.17397995 | 0.00025074 |
| Quinolinic acid                       | 2.31373508 | 0.00355612 |
| 2-Hydroxyglutarate                    | 2.51123174 | 0.00086161 |
| Aspartate                             | 2.78415166 | 0.00207274 |
| Malate                                | 2.93309783 | 6.6682E-05 |
| Normetanephrine                       | 3.13726198 | 5.0121E-05 |
| Benzoic acid                          | 3.35105678 | 0.0036788  |
| 4-Methylvaleric acid/Hexanoic acid    | 3.61625554 | 8.9637E-05 |
| 4-Imidazoleacetic acid                | 4.20413374 | 0.00058171 |
| Dihydroxyacetone                      | 4.24571115 | 0.01398476 |
| Alanine                               | 4.57066623 | 0.00991176 |
| Sarcosine                             | 4.61732922 | 0.01179264 |
| Aconitic acid                         | 5.38944415 | 0.00775302 |
| Alpha-Ketoglutaric Acid               | 5.70991698 | 0.00176391 |
| Acetyl-L-glutamine                    | 6.08038835 | 0.03093061 |
| Phenylpyruvic acid                    | 7.83130302 | 0.00765058 |
| Proline                               | 8.20289366 | 1.9388E-06 |
| Xylose                                | 9.61520332 | 1.0633E-05 |
| Ribose                                | 9.6751641  | 7.5666E-06 |
| alpha-Ketoisovaleric acid/Maleic acid | 12.0929972 | 2.9825E-05 |
| Citraconic acid                       | 17.0965264 | 1.4729E-05 |
| 4-Methyl-2-oxopentanoic acid          | 18.0844054 | 9.6915E-06 |
| 3-Phenyllactic acid                   | 18.8339823 | 4.9712E-05 |
| Lactate                               | 19.587286  | 2.0052E-05 |

(continued)

**Table E4** (Continued)

| Sample ID                  | Hypoxia    | P-value    |
|----------------------------|------------|------------|
| Adenosyl-L-homocysteine    | 22.3546448 | 0.00019857 |
| Suberic acid               | 26.4862619 | 0.00042595 |
| Glutaconic acid            | 27.0849387 | 1.0027E-05 |
| Isobutyric acid            | 27.6334748 | 0.00165934 |
| Leucic acid                | 42.4046412 | 0.00093114 |
| 3-Methyl-2-oxovaleric acid | 61.0530539 | 0.00054081 |
| Oxaloacetic acid           | 74.0169502 | 6.5718E-05 |
| Ribose-5-Phosphate         | 80.1852711 | 2.3417E-05 |
| Asparagine                 | 117.059097 | 1.5017E-05 |





**Table E6.** Comparison of metabolites in medium from cultures of MS-5 cells did not show any significant differences in hypoxia versus normoxia on day 4.

| Label                                                       | Hypoxia-1  | Hypoxia-2  | Hypoxia-3  | Hypoxia-4  | Normoxia-1 | Normoxia-2 | Normoxia-3 | Normoxia-4 | P-value    |
|-------------------------------------------------------------|------------|------------|------------|------------|------------|------------|------------|------------|------------|
| Citraconic acid                                             | -0.9872478 | 0.27407162 | -0.6484408 | -0.5868191 | -0.5839318 | -0.9077349 | -0.8138143 | -1.0366568 | 0.26739538 |
| Serine                                                      | -1.8136917 | -1.3275178 | -2.9856015 | -0.2586346 | -2.7973711 | -2.8927172 | -1.5034804 | -3.1342711 | 0.19393313 |
| Norvaline                                                   | 0.73201811 | 0.19611048 | 0.92006829 | 0.14297897 | 0.7994441  | 0.89944849 | 0.81403224 | 0.92560174 | 0.11463705 |
| L-Alloisoleucine/Leucine/Norleucine                         | 0.49151395 | 0.21174973 | 0.58029194 | 0.19900297 | 0.46256561 | 0.5929336  | 0.5629938  | 0.66742234 | 0.10699044 |
| Asparagine                                                  | -0.2122064 | -0.0279469 | 0.47530336 | -0.5905703 | 0.32169452 | 0.35660229 | -0.3607864 | -0.0954777 | 0.62561358 |
| Isoleucine                                                  | 0.50119277 | 0.20182258 | 0.59620235 | 0.19949676 | 0.44930563 | 0.58989395 | 0.5482555  | 0.6545995  | 0.1451476  |
| Valine                                                      | 0.75144443 | 0.20808054 | 0.92702178 | 0.13491489 | 0.78540854 | 0.90730032 | 0.79914951 | 0.90785448 | 0.13480296 |
| Glucose                                                     | -0.6407107 | -0.0807279 | -0.8452632 | 0.02515443 | -0.9692667 | -0.9575251 | -0.7106409 | -0.8479426 | 0.06936222 |
| Sorbitol                                                    | 0.44298346 | 0.2226198  | 0.27451014 | -1.0747752 | 0.4288429  | 0.43055621 | 0.4880617  | 0.35496793 | 0.23891832 |
| Fumarate                                                    | -1.6485208 | 0.30850689 | -1.2560701 | -0.7043435 | -1.0422394 | -1.4058609 | -1.1968284 | -1.6481667 | 0.30522382 |
| Glyoxylic acid                                              | -0.7491168 | -0.1051899 | -0.8852895 | 0.04607433 | -0.9731434 | -1.0795462 | -0.463268  | -0.9258446 | 0.15443083 |
| Homoserine/Threonine                                        | 0.2268792  | 0.04777856 | 0.32184732 | 0.19021888 | 0.2681468  | 0.27648018 | 0.22024944 | 0.41353718 | 0.21370239 |
| Threonine                                                   | 0.2268792  | 0.04777856 | 0.32184732 | 0.19021888 | 0.2681468  | 0.27648018 | 0.22024944 | 0.41353718 | 0.21370239 |
| Methionine                                                  | 0.32878891 | -0.0543615 | 0.37666286 | 0.08969938 | 0.24330369 | 0.4581445  | 0.40299067 | 0.49760376 | 0.11262921 |
| Sarcosine                                                   | -0.7345101 | 0.35728828 | -0.5243461 | -0.0074076 | -0.5228089 | -0.4780081 | -0.9246206 | -0.4473796 | 0.22643302 |
| Alanine                                                     | -0.8568321 | 0.31804752 | -0.4884081 | -0.2064043 | -0.5681934 | -0.4428955 | -0.8030971 | -0.4568505 | 0.35923381 |
| Kynurenine                                                  | 0.13360332 | -1.8021755 | 1.16249193 | 0.65006289 | 1.12658711 | 1.11988931 | 0.01244563 | 1.49563015 | 0.25829712 |
| Phosphocreatine                                             | -1.3994529 | -0.8306978 | -1.2827666 | -0.4672827 | -0.0189676 | -0.565227  | 1.10493433 | -0.6741593 | 0.08285467 |
| Dihydroxyacetone                                            | 0.23295503 | 0.68105591 | 0.07980809 | 0.79384621 | -0.0101713 | 0.50116797 | 0.93989867 | -0.2335302 | 0.65541356 |
| 4-Methyl-2-oxopentanoic acid/Ketoleucine/<br>Ketoisoleucine | -0.8362817 | 0.45293652 | -0.5780128 | -0.5319664 | -0.6075408 | -0.8258672 | -0.6085623 | -0.8072028 | 0.28648658 |
| Isobutyric acid                                             | -0.3764345 | 0.51458271 | -0.7581065 | 0.09388476 | -1.1214353 | -1.1309851 | -0.2487041 | -1.4489976 | 0.06435073 |
| 4-Methylvaleric acid/Hexanoic acid                          | -2.6674166 | 0.20514941 | -1.1246652 | -0.6395551 | -1.2213925 | -1.3307357 | -1.2454298 | -1.5854901 | 0.65165932 |
| 2-Methylbutyric acid/Valeric acid                           | -2.7202093 | -1.1890161 | -2.0824953 | -0.4400682 | -1.9759838 | -2.0658974 | -2.4993712 | -1.9492443 | 0.35730187 |
| Hydroxyproline                                              | -0.5030719 | 0.08302284 | -0.4200176 | 0.31993207 | -0.6435331 | -0.5794523 | -0.5206805 | -0.167324  | 0.17309911 |
| Mannose                                                     | -0.5454272 | 0.06064809 | -0.9494005 | -0.026014  | -0.7484141 | -1.0767029 | -0.5245301 | -0.8488424 | 0.14906045 |
| TMAO                                                        | 0.03918242 | -0.3867489 | -0.1635373 | 0.22833498 | -0.3888224 | 0.09602039 | -0.362078  | 0.18032989 | 0.81809969 |
| Glutamine                                                   | 2.19846677 | 0.99112992 | 2.06677119 | -0.2140551 | 2.01855273 | 1.95279461 | 2.25808644 | 1.87335007 | 0.22597008 |
| 2-Amino adipic acid                                         | 0.28464197 | 0.53833775 | -0.0570325 | 0.38608948 | -0.140161  | 0.00421802 | 0.36881572 | 0.52877623 | 0.64342627 |
| alpha-Ketoisovaleric acid/Maleic acid                       | -1.4429711 | 0.26842586 | -1.1795    | -0.5890293 | -0.8912574 | -1.3480659 | -0.9649007 | -1.462642  | 0.32775262 |
| 13C3-Lactate                                                | -0.054028  | 0.00353519 | -0.0185695 | 0.33483195 | -0.1797193 | 0.05121261 | 0.03583087 | -0.1416429 | 0.29149375 |
| Lactate                                                     | 2.23442266 | 0.80264172 | 2.23725611 | -0.864902  | 2.15491932 | 2.23049901 | 2.18321638 | 2.09413911 | 0.19981183 |
| Adipic acid                                                 | 3.37042968 | 1.53587855 | 2.92585798 | 1.05389985 | 2.53323187 | 2.92091508 | 3.14649714 | 1.38436123 | 0.69870934 |
| Methylguanidine                                             | 0.14043472 | -0.0845307 | 0.11314606 | -0.0386434 | 0.19643286 | 0.07323716 | 0.18806908 | 0.2033401  | 0.08152191 |
| Pyridoxine                                                  | 0.36719837 | 0.46935507 | 0.28707519 | -0.4904822 | 0.40930552 | 0.06427102 | 0.29173821 | 0.47581243 | 0.54557085 |
| 9-Octadecynoic acid                                         | -1.4231354 | -0.0078481 | -1.1999426 | -0.1432924 | -1.2386606 | -1.5872296 | -0.9822006 | -1.1597075 | 0.20158624 |
| HIAA                                                        | -0.76181   | -0.7867464 | 0.2652052  | 0.01802176 | -0.0864655 | 0.41754176 | -0.6757387 | 0.7296391  | 0.35159916 |
| 2-Aminobutyric acid                                         | 3.69911809 | 1.53470365 | 3.8272314  | 1.1634846  | 3.85624676 | 3.72298758 | 3.5880669  | 3.8794318  | 0.13798392 |
| Glutamic acid                                               | -1.1707076 | -0.1791773 | -0.567976  | -0.4890275 | -0.7756742 | -0.7783538 | -1.1930937 | -0.6337794 | 0.34943754 |
| 3-Methyl-2-oxovaleric acid                                  | -0.8178572 | 0.52145717 | -0.5471512 | -0.4270521 | -0.7225034 | -0.8448916 | -0.5583508 | -0.7971401 | 0.21511797 |
| Histamine                                                   | -0.1485253 | 0.11424347 | -0.2476388 | -0.2142434 | -0.4788143 | -0.4504302 | -0.2246446 | -1.1776027 | 0.0842145  |
| 5-Aminolevulinic acid                                       | -0.3988192 | 0.17638736 | -0.3145786 | 0.3677737  | -0.5304872 | -0.4828388 | -0.4206589 | -0.0794666 | 0.16504154 |
| Tryptophan                                                  | 0.3354711  | -0.1461558 | 0.4901938  | -0.3411589 | 0.12023631 | 0.40342001 | 0.48325591 | 0.65022249 | 0.19364873 |
| Pipecolic acid                                              | -0.8753164 | -0.1512818 | -0.5885943 | -0.1653906 | -0.7802655 | -0.4485057 | -0.9440747 | -0.485136  | 0.34125134 |
| 3-hydroxykynurenine                                         | -0.5945549 | -0.0599903 | -1.4357829 | -0.5096303 | 0.57336747 | -0.5983266 | -1.2423897 | -0.5183379 | 0.68224786 |

(continued on next page)

Table E6 (Continued)

| Label                                                     | Hypoxia-1  | Hypoxia-2  | Hypoxia-3  | Hypoxia-4  | Normoxia-1 | Normoxia-2 | Normoxia-3 | Normoxia-4 | P-value    |
|-----------------------------------------------------------|------------|------------|------------|------------|------------|------------|------------|------------|------------|
| 2/3-Aminoisobutyric acid/Dimethylglycine                  | 3.4859676  | 1.49670988 | 3.84121588 | -1.6365723 | 3.73015171 | 3.51860199 | 3.14322091 | 4.05277834 | 0.20296417 |
| Nicotinamide                                              | 0.02517674 | -0.1078659 | 0.11853892 | -0.3291309 | -0.1102332 | -0.102231  | -0.0495663 | 0.20624927 | 0.6449802  |
| Myristic acid                                             | -0.5773634 | -0.4376603 | -1.191743  | 0.09064003 | -0.5995869 | -0.5255144 | -0.2554543 | -0.5350572 | 0.86107299 |
| Uridine                                                   | -1.1643965 | -1.8921944 | -0.4978597 | -1.2263561 | -1.0667004 | -0.4069956 | -1.1894229 | -0.7690212 | 0.35171505 |
| L-(+)-Arabinose                                           | -0.9389194 | -0.326999  | -1.1590547 | -0.1014193 | -1.3212851 | -1.3546592 | -0.793595  | -1.3278043 | 0.09238329 |
| Quinolinic acid                                           | 0.06335475 | 0.15183698 | 0.00919032 | 0.11160968 | -0.2354491 | 0.06813628 | 0.10547494 | 0.02351364 | 0.3028964  |
| Aspartate                                                 | -1.3576267 | 0.2298994  | -1.0263901 | -0.3875949 | -0.4684876 | -0.8038537 | -1.2100624 | -0.654517  | 0.7127799  |
| Stearic acid                                              | -0.3562762 | -0.063728  | -0.6432848 | 0.09577362 | -0.5215432 | -0.8021734 | 0.06401336 | -0.6408929 | 0.38596366 |
| Phenylalanine                                             | -0.0573723 | -0.0617509 | -0.0491845 | -0.2173615 | 0.0409615  | -0.0722665 | 0.03281024 | -0.0635365 | 0.16043092 |
| Dulcitol                                                  | 0.21421179 | 0.14868816 | 0.30177712 | -1.3024393 | 0.18559045 | 0.21321159 | 0.26241803 | 0.16275114 | 0.3767293  |
| Glycine                                                   | -0.7383682 | -0.211558  | -0.6148624 | -0.3174122 | -0.6123031 | -0.7071909 | -0.8267039 | -0.5144934 | 0.2149107  |
| L-(-)-Arabitol                                            | 0.02145053 | 0.25091267 | -0.1996179 | -0.1128398 | -0.3687413 | -0.2687208 | -0.0736568 | -0.3668067 | 0.07415608 |
| Phenylpyruvic acid                                        | -3.0515063 | -0.763465  | -2.7412021 | -0.8246925 | -2.4468444 | -2.9141586 | -2.8669767 | -2.4944788 | 0.22806193 |
| 3-Phenyllactic acid                                       | -0.7378812 | -0.245645  | 0.87248304 | -0.7910685 | 0.92546372 | 0.45774882 | -0.8838451 | 0.76545218 | 0.37414296 |
| Isovaleric acid                                           | -0.3823668 | -0.2336078 | -0.9801439 | 0.06263479 | -1.0861459 | -1.2917229 | -0.4207738 | -1.1545595 | 0.08435989 |
| Malate                                                    | -0.0151609 | 0.10051057 | 0.62584811 | -0.122317  | 0.21125104 | 0.47606365 | 0.25733675 | 0.50990595 | 0.2800524  |
| Nonadecanoic acid                                         | -0.3434715 | -0.3284635 | -1.0788992 | 0.28960355 | -0.490825  | -0.2396225 | 0.09432271 | -0.4451829 | 0.76964843 |
| D-Mannitol                                                | 0.49214324 | 0.24626119 | 0.36157852 | -1.3929167 | 0.36892853 | 0.3034528  | 0.28001726 | 0.44158672 | 0.37910365 |
| 4-Hydroxyphenylacetic acid/Mandelic acid                  | -1.6861093 | 0.26669436 | -1.1541376 | -0.6521432 | -1.6554874 | -1.6138903 | -1.5100585 | -1.8478206 | 0.09009311 |
| 2-Deoxycytidine                                           | -0.8371964 | -1.8941494 | -2.8962966 | 1.38511637 | -2.4036099 | -2.5545625 | -0.6259565 | -3.1354213 | 0.33381527 |
| 6-Methyl-DL-Tryptophan                                    | -0.7463397 | -0.1207241 | -0.7518561 | 0.26006764 | -1.0161533 | -0.8399768 | -0.5930635 | -0.7410011 | 0.13379218 |
| Adonitol                                                  | -0.2418653 | 0.11498105 | -0.4539442 | -0.4525158 | -0.5432157 | -0.5326121 | -0.2626953 | -0.6040653 | 0.19056514 |
| Oxaloacetic acid                                          | 0.84474277 | 0.72813782 | 0.84190297 | -0.0519829 | 0.52135826 | 0.97155094 | 0.49680606 | 0.02451609 | 0.77385953 |
| 2-Hydroxyphenylacetic acid/<br>3-Hydroxyphenylacetic acid | -1.8252571 | 0.11865191 | -1.2458492 | -0.7547266 | -1.7851833 | -1.7466178 | -1.7330754 | -1.9312037 | 0.07969972 |
| Pentadecanoic acid                                        | -1.2248551 | -0.7226078 | -1.4803334 | 0.06770799 | -0.7112931 | -1.4481806 | 0.25188702 | -1.1973005 | 0.90399075 |
| Metanephine                                               | -0.0690907 | 0.47116831 | -0.0376173 | -0.3581745 | -0.1307044 | -0.0883418 | 0.18862742 | 0.18119005 | 0.85724729 |
| Ribose                                                    | 1.50052051 | 0.47298045 | 1.27901973 | -0.8691085 | 1.28145647 | 1.45260053 | 1.37712255 | 1.08240619 | 0.24241366 |
| Caprylic acid                                             | -0.0772244 | 0.20202844 | -0.2089145 | 0.11396497 | -0.8580296 | -0.2288137 | -0.7195034 | -0.0584628 | 0.06766379 |
| Xylose                                                    | 1.51088934 | 0.44987737 | 1.29751684 | -0.8584282 | 1.29323677 | 1.45602017 | 1.37850796 | 1.08228973 | 0.24362105 |
| Pyroglutamic acid                                         | -0.3182003 | -0.1128841 | 0.07318498 | 0.2598395  | -0.2762514 | 0.05997982 | -0.2161614 | 0.16496019 | 0.80415478 |
| Normetanephine                                            | -1.5756078 | 0.13626275 | -0.9917419 | -0.8341561 | -1.0182553 | -1.0987574 | -1.3924579 | -1.0276837 | 0.41839265 |
| Succinate                                                 | -0.4811019 | 0.12562508 | -0.4082239 | -0.0378646 | -0.4931641 | -0.4764612 | -0.4274422 | -0.4110261 | 0.13775522 |
| Ethylmalonic acid                                         | -0.535705  | -0.6796354 | -0.8054726 | 0.31625991 | -0.8799436 | -0.4460628 | -0.1781857 | -0.2925848 | 0.9405441  |
| Creatinine                                                | -0.1072695 | 0.06485068 | -0.2358385 | -0.4544783 | -0.1380674 | -0.3027073 | -0.1564101 | -0.0890522 | 0.92516186 |
| Creatine                                                  | 0.47774782 | 0.44713967 | 0.3105809  | 0.57494932 | 0.22559403 | 0.24086674 | 0.05890054 | 0.53145259 | 0.14450394 |
| Trehalose                                                 | -0.2334607 | -0.3458024 | -1.4112059 | -2.2766588 | -0.7947193 | -0.8826727 | -0.2453821 | -1.6007102 | 0.75000844 |
| Methylmalonic acid                                        | -0.4831654 | 0.12394687 | -0.4096865 | -0.0389591 | -0.4937286 | -0.4781164 | -0.4309098 | -0.413153  | 0.13731677 |
| Lauric acid                                               | -1.0432568 | -0.4003263 | -0.8672772 | -0.2238923 | -0.7992694 | -0.5793058 | -0.7569318 | -0.6016761 | 0.80888787 |
| beta-Hydroxyisovaleric acid                               | 0.32321764 | -0.1682122 | 1.67252025 | -1.6048371 | 2.73117112 | 1.54795444 | 0.39546164 | 1.70847712 | 0.11241544 |
| Imidazole                                                 | 0.88892719 | -0.3659624 | 0.07679413 | 0.28849773 | 0.15666556 | 0.57198821 | -0.3063157 | 1.5058602  | 0.59666599 |
| Heptadecanoic acid                                        | 0.39474116 | -1.1914353 | -0.6149823 | -0.3176486 | -1.3283594 | 0.2701543  | -0.7214764 | 0.20267577 | 0.94256663 |
| Xylitol                                                   | 0.01080448 | 0.28053463 | 0.04563945 | -0.3204084 | -0.2519605 | -0.2176392 | 0.02226439 | -0.1076371 | 0.34127082 |
| Ornithine                                                 | -0.7053886 | 0.18000525 | -0.1997898 | 0.09474047 | -0.0752082 | -0.2770914 | -0.748254  | -0.0424363 | 0.63673379 |
| Leucic acid                                               | -0.2295989 | 0.820285   | 1.06933022 | -0.5318694 | 0.9018227  | 1.05318869 | -0.2464285 | 0.76554395 | 0.51730691 |

(continued on next page)

Table E6 (Continued)

| Label                              | Hypoxia-1  | Hypoxia-2  | Hypoxia-3  | Hypoxia-4  | Normoxia-1 | Normoxia-2 | Normoxia-3 | Normoxia-4 | P-value    |
|------------------------------------|------------|------------|------------|------------|------------|------------|------------|------------|------------|
| Benzoic acid                       | -1.5161413 | -1.4085937 | -0.0255448 | 0.14481333 | 0.22162257 | 0.00749664 | -1.6239008 | -0.2168404 | 0.64037554 |
| Phenylacetic acid                  | -0.1928152 | -0.4590375 | -0.0012272 | 0.2765843  | -0.1579652 | -0.0985582 | -0.8022439 | 0.17946749 | 0.64488683 |
| Cytidine                           | -0.6387399 | -1.0455679 | -0.3647243 | -0.7503269 | -0.420615  | -0.4815804 | -0.5783594 | 0.15388267 | 0.14070332 |
| Palmitic acid                      | -0.532438  | -0.4674046 | -0.8751209 | -0.1286439 | -0.641371  | -0.8232573 | -0.6305924 | -0.4750163 | 0.43330731 |
| Acetylcarnitine                    | 0.68387367 | 0.31465648 | 0.23439013 | -0.1197967 | 0.37067698 | 0.36780583 | 0.46882203 | 0.1642123  | 0.72746913 |
| Tyrosine                           | 0.16746471 | -0.046614  | 0.16129232 | -0.5233618 | -0.0558385 | 0.10805873 | -0.0616528 | 0.27130696 | 0.5118422  |
| Cystine                            | 0.43349697 | 0.41443451 | 0.0773585  | -0.2617239 | 0.30357387 | 0.10453174 | 0.27620223 | 0.65588926 | 0.43218813 |
| 4-Pyridoxic acid                   | -2.2149126 | 0.60172349 | -2.2096355 | -1.4410542 | -2.3105301 | -2.366773  | -2.5272217 | -2.0017957 | 0.19374817 |
| 4-Hydroxybenzaldehyde              | -3.5996367 | -0.9455904 | -2.9188392 | -1.2824208 | -3.2683587 | -2.8176189 | -3.038208  | -3.4738856 | 0.19134747 |
| Glycocyanine                       | 0.18174242 | 0.02174585 | 0.20175067 | -0.482129  | 0.11289409 | 0.00314024 | 0.26216675 | -0.0347607 | 0.56543745 |
| pregnenolone sulfate               | -0.5218222 | -0.0792184 | -0.5854167 | 0.06640992 | -0.3051484 | 1.05460002 | -0.481144  | -0.7729861 | 0.73635166 |
| 13C5-15N-Glutamic acid             | 0.08277972 | -0.1243656 | -0.0808884 | -0.0192343 | 0.17753724 | -0.1546932 | -0.1024778 | 0.02808068 | 0.80367154 |
| Picolinic acid                     | 0.01215189 | 0.16925794 | 0.13754471 | -0.2892169 | 0.1150842  | 0.14862846 | 0.12154212 | 0.22955994 | 0.22364392 |
| Lysine                             | 0.05679805 | 0.07921408 | 0.10185465 | -0.2374453 | 0.3194568  | 0.0128671  | -0.0086754 | 0.19571493 | 0.28912134 |
| 3-Methyladipic acid                | -0.7630941 | -0.2215062 | -0.7148891 | -0.0895383 | -0.4735883 | -1.0021561 | -0.5959582 | -0.6083051 | 0.32078303 |
| Betaine                            | -0.3808348 | -0.1319643 | -0.2659125 | -0.3770088 | -0.4448277 | -0.1087414 | -0.2949697 | -0.2127376 | 0.80620409 |
| 2-Pyrrolidinone                    | -0.2190347 | -0.1153878 | -0.5338772 | -0.2680294 | -0.5323416 | -0.5791357 | -0.0584727 | -0.310169  | 0.58479294 |
| alpha-KG                           | -0.3652957 | -0.1786159 | -0.32029   | 0.20421245 | -0.6444336 | -0.5178101 | -0.338443  | -0.2493007 | 0.13300984 |
| Carnosine                          | -0.0699488 | 0.29739426 | -0.1273737 | -0.4140822 | 0.27838674 | 0.0134998  | -0.1066015 | 0.02287733 | 0.4643938  |
| Arginine                           | 0.32512336 | 0.21126739 | 0.14875975 | -0.3300058 | 0.35877912 | 0.11650083 | 0.17166118 | 0.43874876 | 0.30576017 |
| Citrulline                         | 0.87984808 | 0.78393735 | 0.31045417 | -0.4362508 | 0.19059974 | 0.47416426 | 0.67666252 | -0.6110194 | 0.64199844 |
| Fructose/Galactose                 | 3.40960288 | 1.29449584 | 3.47542259 | -1.4784355 | 3.59108425 | 3.51391124 | 3.35371353 | 3.56000154 | 0.1683481  |
| N-Acetylmuramic Acid               | -2.2514621 | 0.24963676 | -3.1930817 | -0.3418124 | -2.6845468 | -3.3429091 | -2.2887866 | -3.1822354 | 0.12647834 |
| D-(+)-Cellobiose                   | 0.99618652 | -1.1676573 | -1.1067692 | 0.06749017 | -0.9997616 | -0.864151  | 0.81445648 | -1.7214803 | 0.61966713 |
| Lactose                            | 1.04472999 | -1.1678386 | -1.0776297 | 0.01730991 | -0.8721192 | -0.9768415 | 0.65553769 | -1.770486  | 0.56304879 |
| Erythrose                          | 0.09690499 | 0.50230745 | 0.27991519 | -0.229254  | -0.0298834 | 0.14376453 | 0.39809653 | 0.2590128  | 0.87140674 |
| malonic acid                       | -0.9705395 | -0.4387    | -2.9099437 | -0.4999217 | -3.0483824 | -3.0236972 | -1.1687587 | -2.8012158 | 0.12600541 |
| Levulinic acid                     | -0.7152773 | 0.39797499 | -3.7767528 | -0.3194873 | -4.6706938 | -4.4882428 | -0.8136858 | -4.9990174 | 0.0975578  |
| Urocanic acid                      | -0.4748155 | -0.8212572 | -0.4485712 | -2.8982264 | -0.2435936 | -0.4407773 | -0.6597613 | 0.26059801 | 0.19963105 |
| 4-Imidazoleacetic acid             | -0.3348381 | 0.33558326 | -0.1574624 | 0.26151042 | 0.02071175 | 0.00487928 | -0.342746  | -0.015743  | 0.57348707 |
| Carnitine                          | -0.6235938 | -0.1436276 | -0.4373712 | -0.6153123 | -0.3233859 | -0.6301862 | -0.7401828 | -0.355754  | 0.7187753  |
| 2HG                                | -0.0200087 | 0.01326397 | 0.44989405 | -0.161683  | 0.46510149 | 0.28231762 | 0.05300144 | 0.41517008 | 0.19713709 |
| Cytosine                           | -0.9591877 | -1.2268134 | -1.2101742 | -0.6877136 | -0.7471613 | -0.6000961 | -1.0085117 | -0.2021445 | 0.12043094 |
| Histidine                          | -0.0798178 | 0.40466708 | -0.6957078 | -0.7078621 | -0.1763087 | -1.2236524 | -5.9963249 | -2.0110006 | 0.16025266 |
| R5P                                | 0.34283779 | 0.2964006  | 1.07437843 | -0.2424858 | 0.90983686 | 0.96537117 | 0.1057327  | 0.64232532 | 0.42191255 |
| Glyceric acid                      | -0.8187331 | -0.6861564 | -0.6377363 | -0.0915493 | -0.8304395 | -0.5271091 | -0.6262635 | -0.8652965 | 0.42505469 |
| 2-hydroxybutyric acid/Malonic acid | 0.52451094 | 0.45747902 | -0.8987707 | -0.6828683 | -0.6179829 | -1.0165926 | 0.18617721 | -1.0955323 | 0.34509498 |
| Pantothenic acid                   | -0.0710321 | 0.5975017  | -0.0398278 | -0.2155784 | 0.18290529 | 0.04366369 | 0.26509269 | 0.19923465 | 0.59412623 |
| 6-Hydroxynicotinic acid            | -0.048533  | -0.3330571 | 0.05495437 | -1.5321452 | 0.17739187 | 0.04360882 | -0.1864967 | 0.49488889 | 0.17847513 |
| Proline                            | 0.7556949  | 0.41456495 | 1.45390621 | -0.7938494 | 1.37939637 | 1.25058387 | 0.5612598  | 1.45084485 | 0.21907681 |
| D-Xyloic Acid (Lithium Salt)       | -0.2058889 | -0.1002017 | -0.164797  | -0.5686456 | -0.0648752 | -0.1932274 | -0.3766275 | 0.57769995 | 0.33157802 |
| N-Acetyl-D-galactosamine           | -1.7823689 | -0.1737066 | -1.6912335 | -1.1151918 | -1.7306591 | -1.4944716 | -1.515446  | -1.1928947 | 0.47685323 |
| 2-Methylglutaric acid              | -0.4816449 | -0.314975  | -0.4925261 | -0.1094251 | -0.8387554 | -0.8417914 | -0.4199245 | -0.3711953 | 0.13831385 |
| 4-Hydroxy-3-methylbenzoic acid     | -2.2285394 | 0.22287583 | -1.693169  | -0.6578803 | -1.762927  | -1.7289186 | -1.1026177 | -2.0392535 | 0.36445838 |
| 2-Hydroxybenzoic acid              | -0.8351354 | -0.1208894 | 0.08170104 | 0.57402993 | 0.0996304  | 0.30244906 | 0.01097878 | 0.00089756 | 0.57420786 |

(continued on next page)

**Table E6** (Continued)

| Label                   | Hypoxia-1  | Hypoxia-2  | Hypoxia-3  | Hypoxia-4  | Normoxia-1 | Normoxia-2 | Normoxia-3 | Normoxia-4 | P-value    |
|-------------------------|------------|------------|------------|------------|------------|------------|------------|------------|------------|
| Acetyl-L-glutamine      | -0.7577037 | 1.03750768 | -0.0365121 | -1.0089686 | 0.04775628 | -0.1391645 | -0.8058392 | 0.19755396 | 0.97520566 |
| Capric acid             | -0.3004565 | -0.1530748 | -0.2855565 | 0.28720268 | -0.6025511 | -0.0553752 | -1.0992756 | -0.0075751 | 0.30383456 |
| Adenosyl-L-homocysteine | -1.6021125 | 0.19482448 | -0.3923763 | -3.0265677 | -0.9857647 | -1.1882158 | -2.2598673 | -2.5549028 | 0.53006208 |
| N-Acetylneuraminic acid | -0.2286805 | 0.15345367 | -0.1293958 | -0.3229765 | -0.3406899 | -0.0647636 | -0.3448388 | -0.1610701 | 0.4687919  |

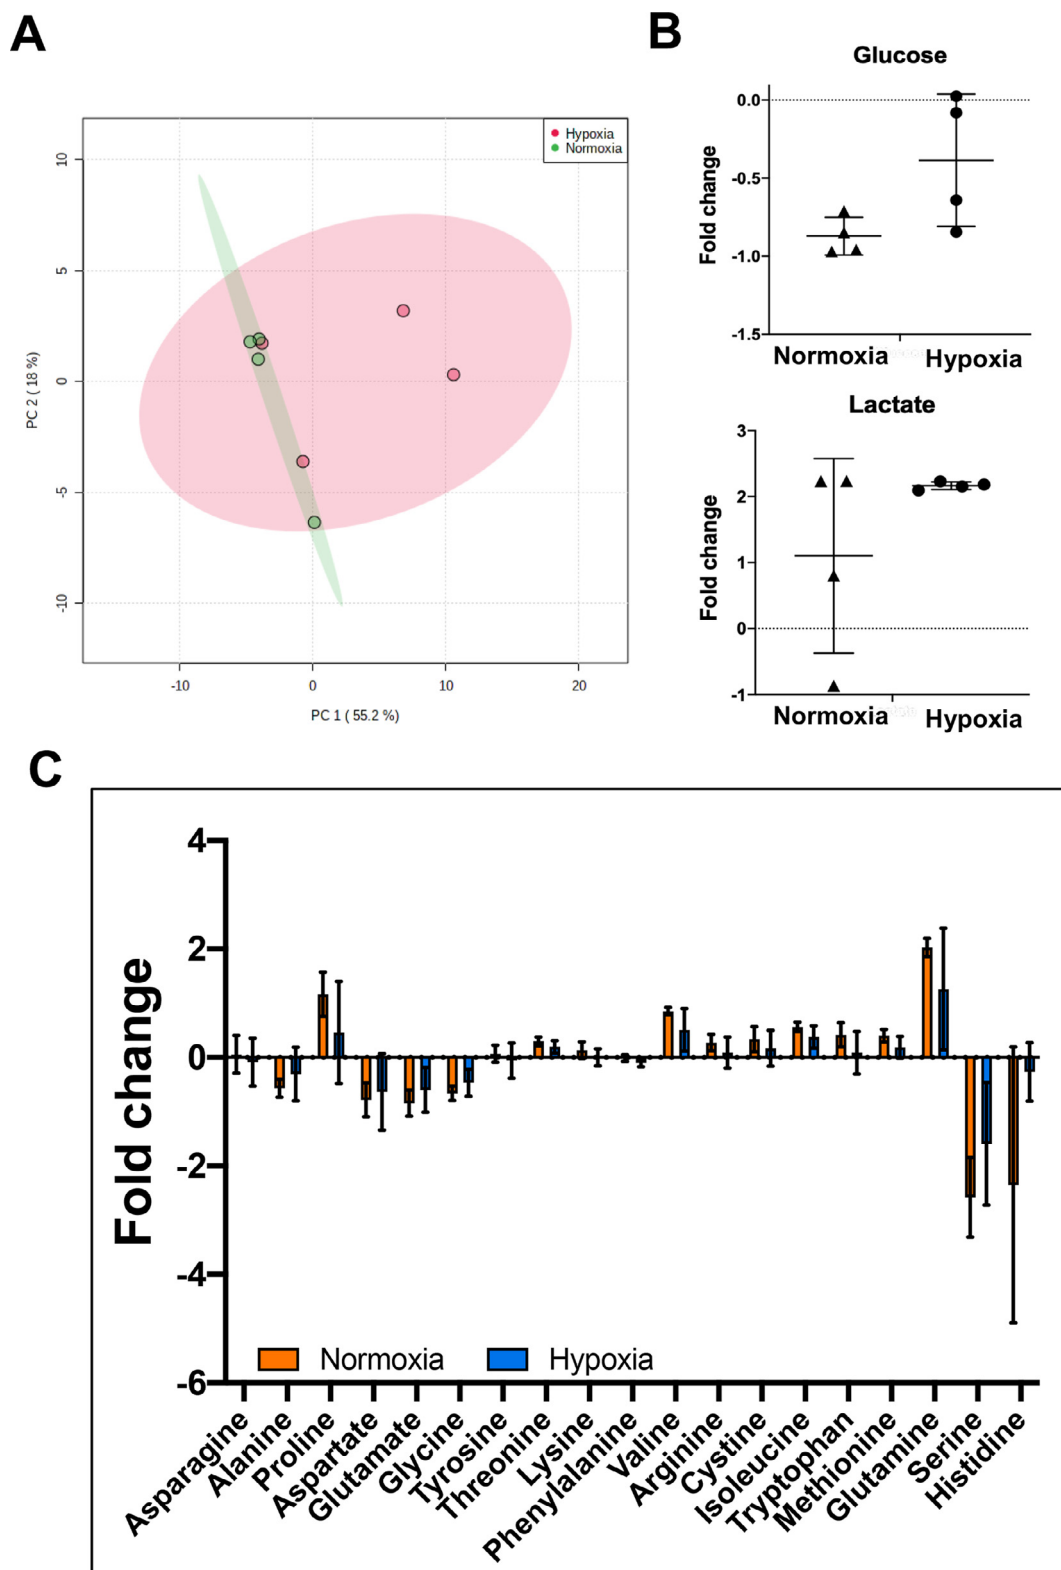

**Figure E4. Hypoxia does not affect metabolic profile of MS-5 cells.** (A) Principal component analysis of samples on the basis of fold change in metabolites in spent medium relative to fresh medium from MS5 cell cultures incubated in hypoxia or normoxia. (B) Fold change in glucose and lactate in spent medium relative to fresh medium from MS5 cell cultures incubated in normoxia or hypoxia. (C). Fold change in amino acids in spent medium relative to fresh medium from MS5 cell cultures incubated in normoxia or hypoxia. Spent medium was collected on day 4 of culture. Statistical analysis was performed in MetaboAnalyst.

## A

## Normoxia

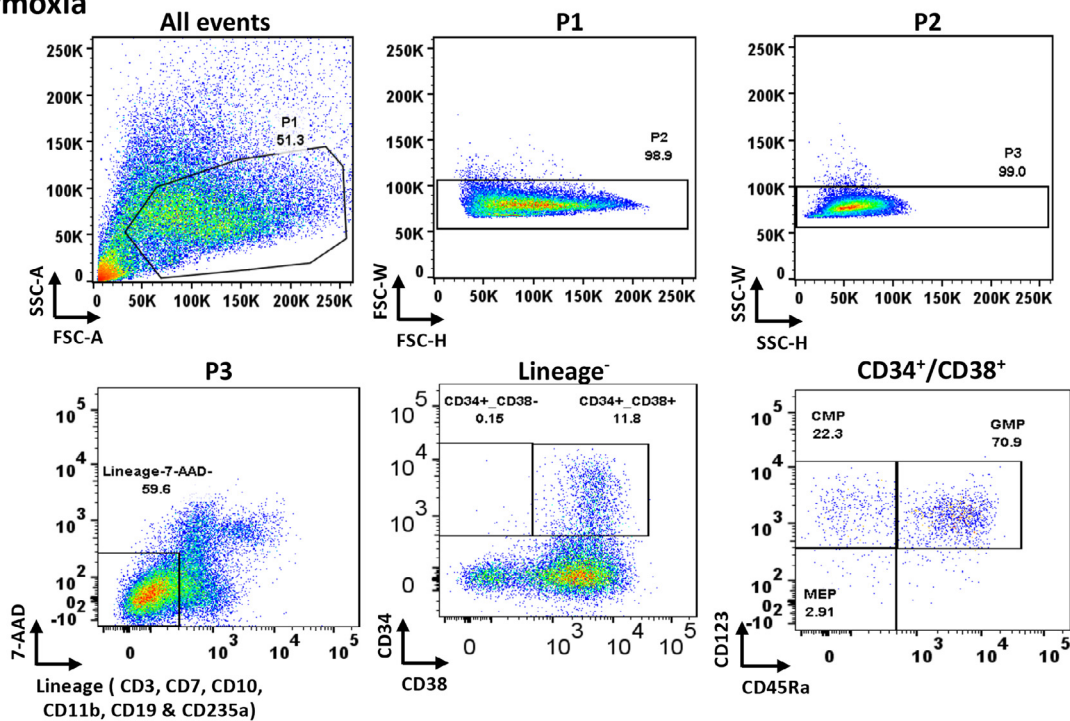

## Hypoxia

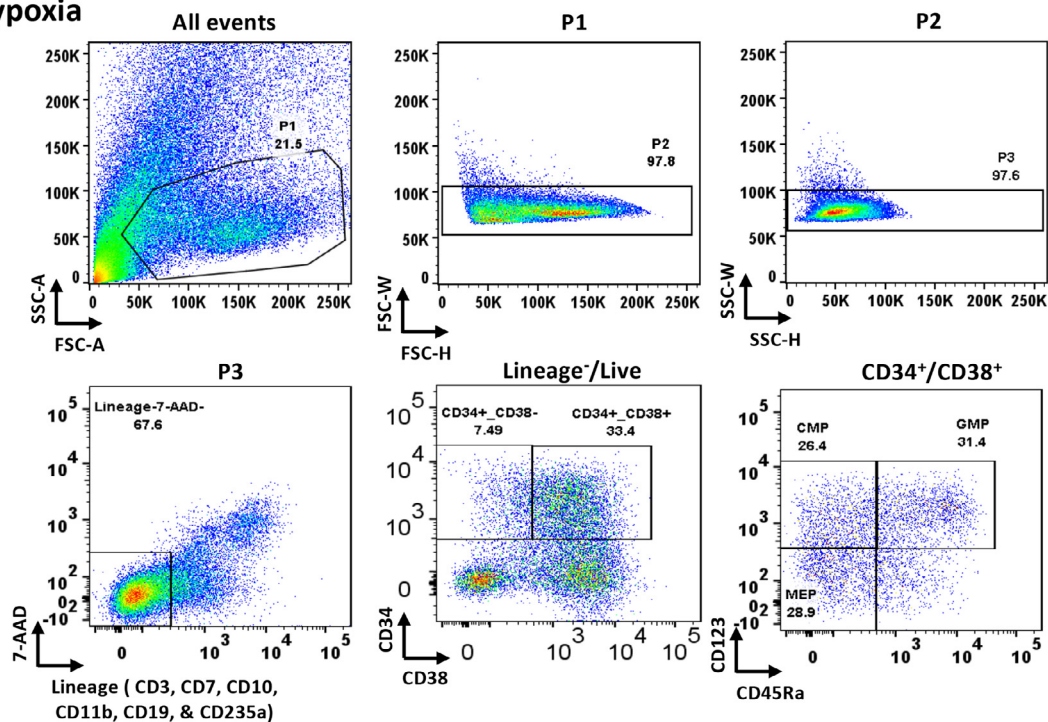

**Figure E5. Hypoxia promotes development of common myeloid progenitors and megakaryo-erythroid progenitors.** (A) Representative scatter plots showing the gating strategy for immunophenotyping of the progenitor cells in cultures incubated in normoxia or hypoxia. Plots for flow cytometry performed on day 21 are shown. MPP, multipotent progenitor (CD34<sup>+</sup>/CD38<sup>+</sup>); CMP, common myeloid progenitor (CD45Ra<sup>-</sup>/CD123<sup>+</sup>); GMP, granulocyte-monocyte progenitor (CD45Ra<sup>+</sup>/CD123<sup>+</sup>); MEP, megakaryo-erythroid progenitor (CD45Ra<sup>-</sup>/CD123<sup>-</sup>). (B) Fold change in the percentage of progenitor cells calculated relative to day 1 is shown.

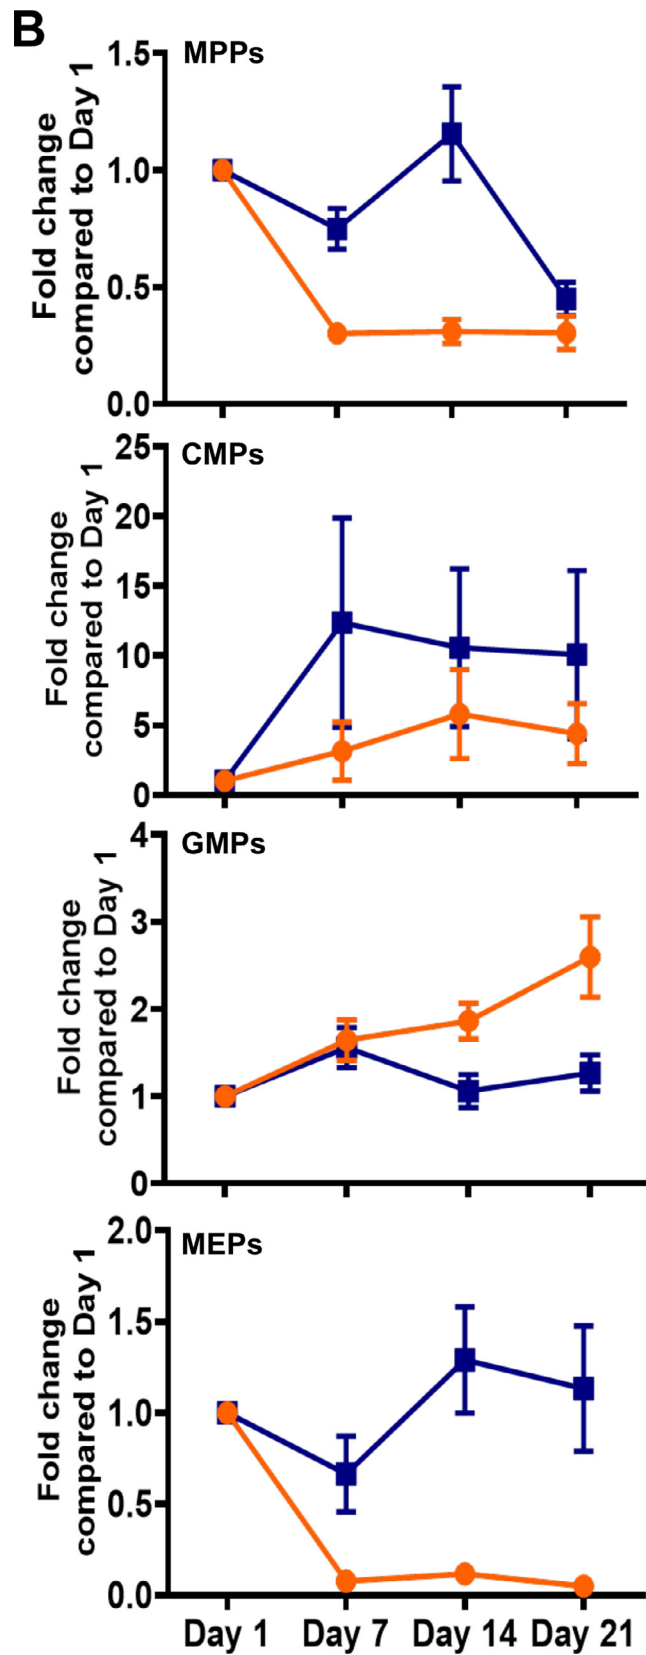

Figure E5. Continued.



## Normoxia

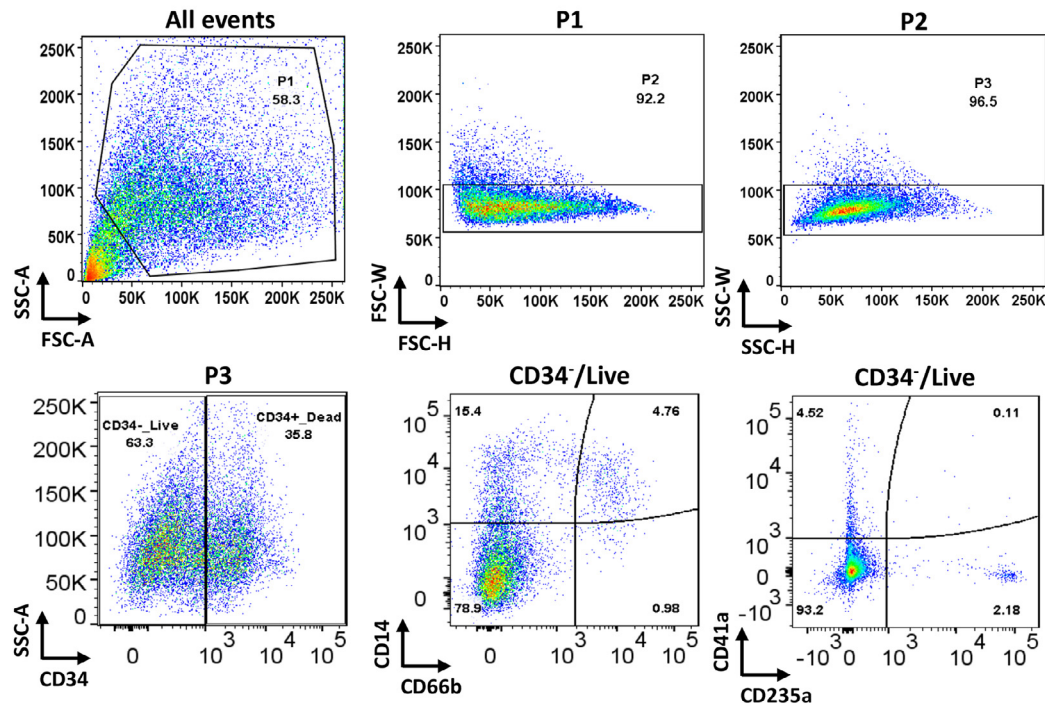

## Hypoxia

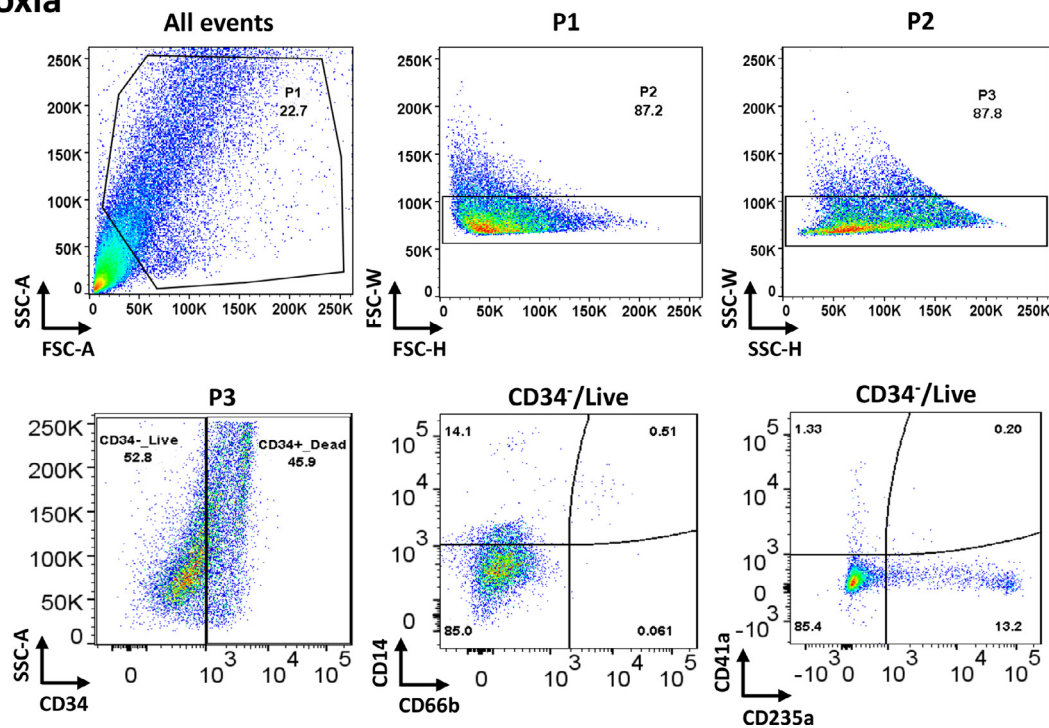

**Figure E6. Hypoxia promotes erythroid differentiation of CD34<sup>+</sup> cells.** Representative scatter plots showing the gating strategy for immunophenotyping of the lineage cells in cultures incubated in normoxia or hypoxia. Plots for flow cytometry analysis performed on day 21 are shown. Lineage cells were monocytes (CD14<sup>+</sup>/CD66b<sup>-</sup>), granulocytes (CD14<sup>-</sup>/CD66b<sup>+</sup>), megakaryocytes (CD41a<sup>+</sup>/CD235a<sup>-</sup>), and erythroid (CD41a<sup>-</sup>/CD235a<sup>+</sup>).

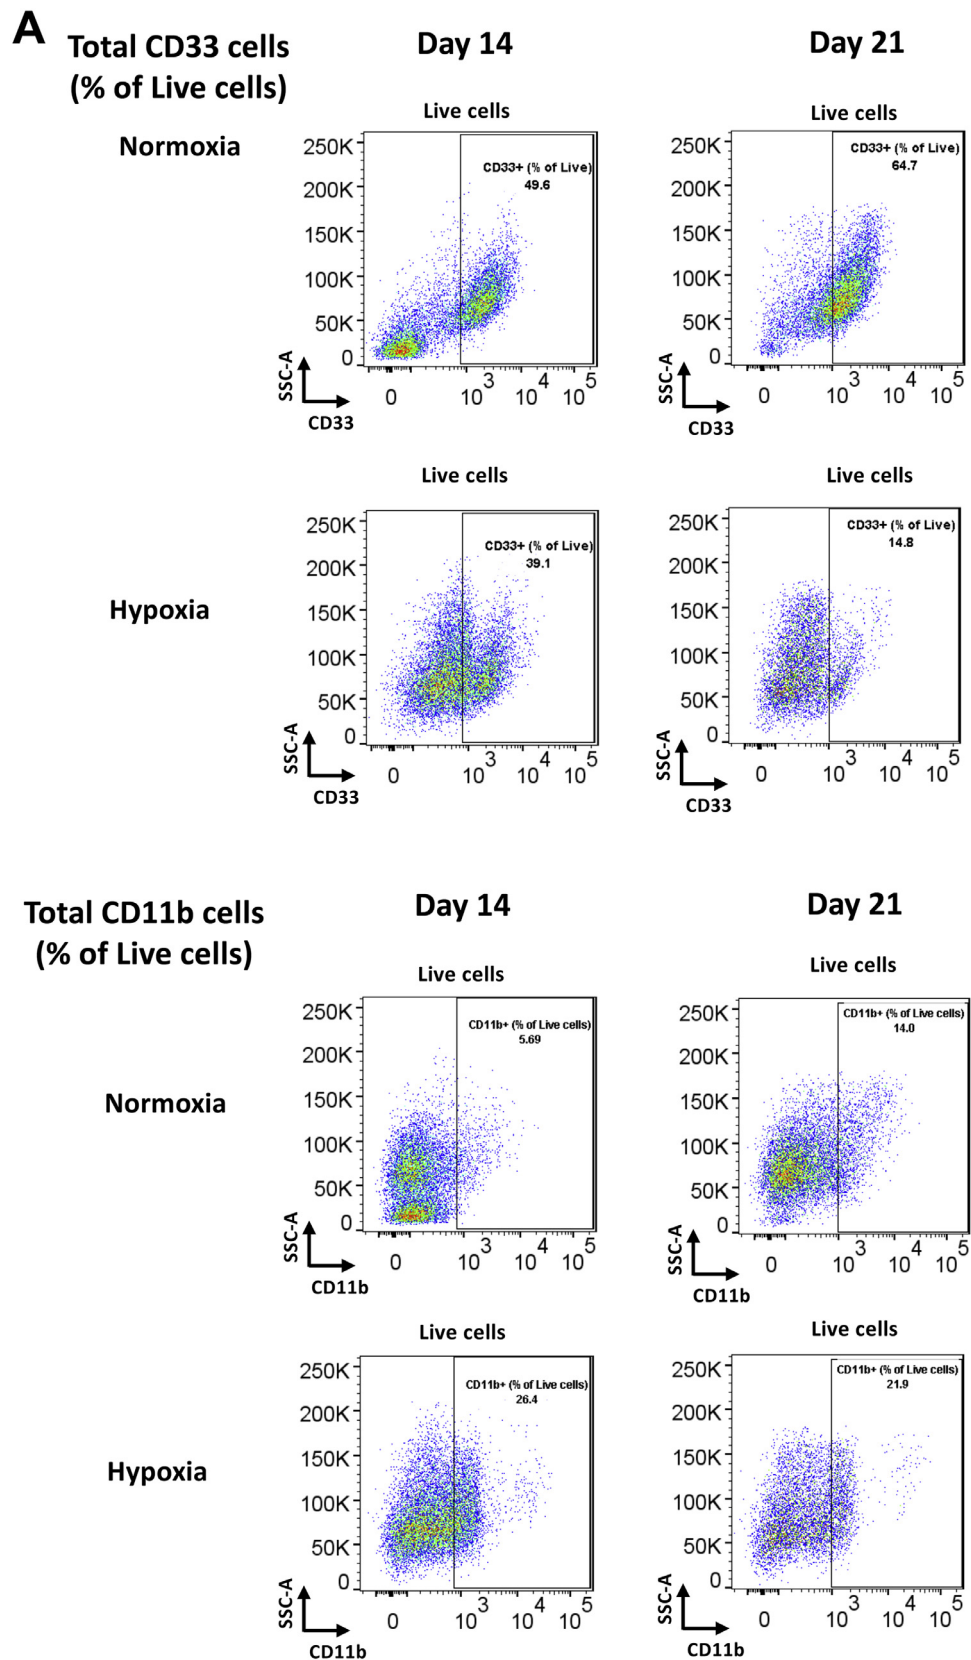

**Figure E7. Hypoxia enhances expression of myeloid markers during myelo-erythroid differentiation of CD34<sup>+</sup> cells.** (A) Representative scatter plots for immunophenotyping for CD33 and CD11b in cultures incubated in normoxia or hypoxia. (B) Quadrant plots for CD34/CD33 and CD34/CD11b expression in the live cell population in normoxia and hypoxia on days 14 and 21 are shown.

**B****CD34 & CD33 cells  
(% of Live cells)****Day 14****Day 21****Normoxia**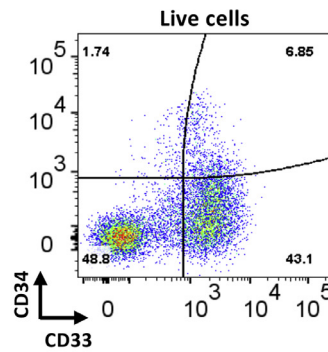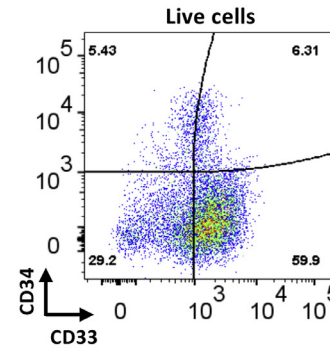**Hypoxia**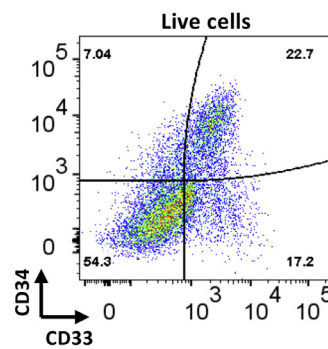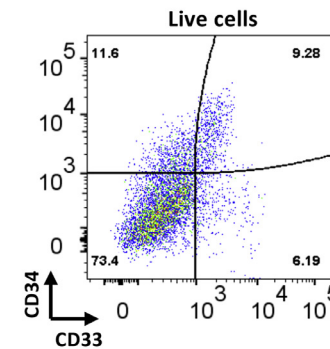**CD34 & CD11b cells  
(% of Live cells)****Day 14****Day 21****Normoxia**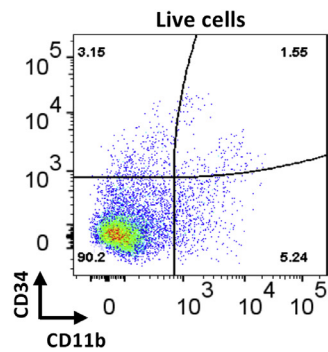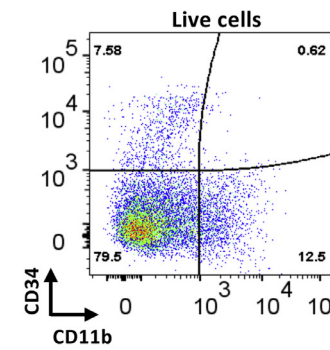**Hypoxia**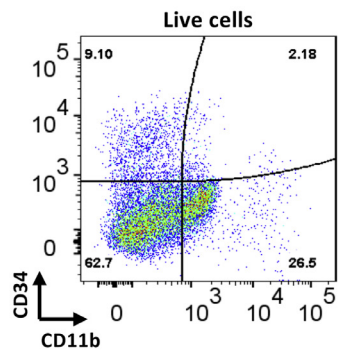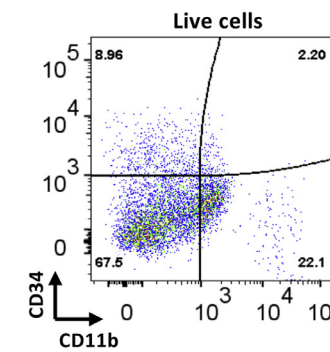

Figure E7. Continued.

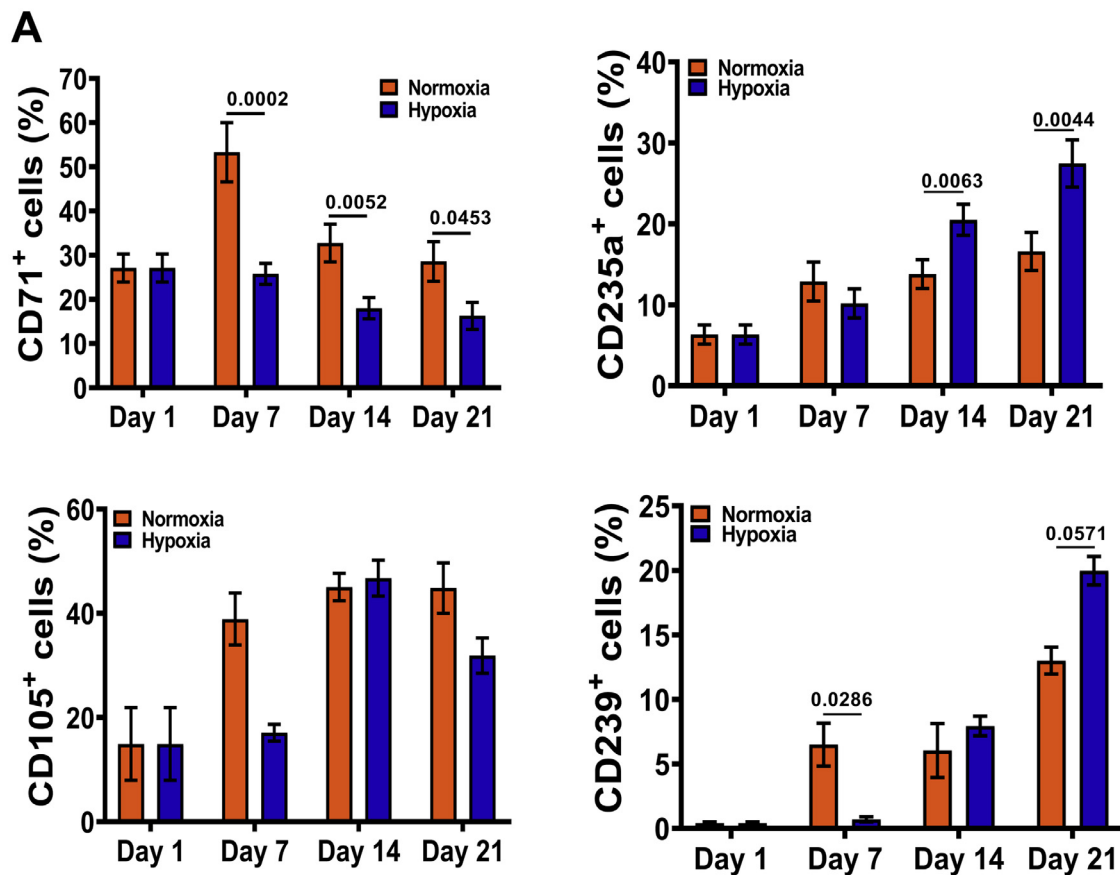

**Figure E8. Hypoxia enhances expression of late erythroid markers.** (A) Percentages of CD71<sup>+</sup>, CD105<sup>+</sup>, CD235a<sup>+</sup>, and CD239<sup>+</sup> cells in the CD34<sup>-</sup>/Live population for cultures incubated in normoxia or hypoxia. Data are represented as mean with standard error (n=4). Statistical analysis was performed using the Mann-Whitney test, and p-values  $\leq 0.05$  were considered significant (\* =  $p < 0.05$ , \*\* =  $p < 0.005$ , \*\*\* =  $p < 0.0005$ ). (B) Representative scatter plots for immunophenotyping for CD71<sup>+</sup> and CD105<sup>+</sup> cells in cultures incubated in normoxia or hypoxia. (C) Representative scatter plots for immunophenotyping for CD235a<sup>+</sup> and CD239<sup>+</sup> cells in cultures incubated in normoxia or hypoxia. Plots for immunophenotyping performed on days 1, 7, 14, and 21 are shown.

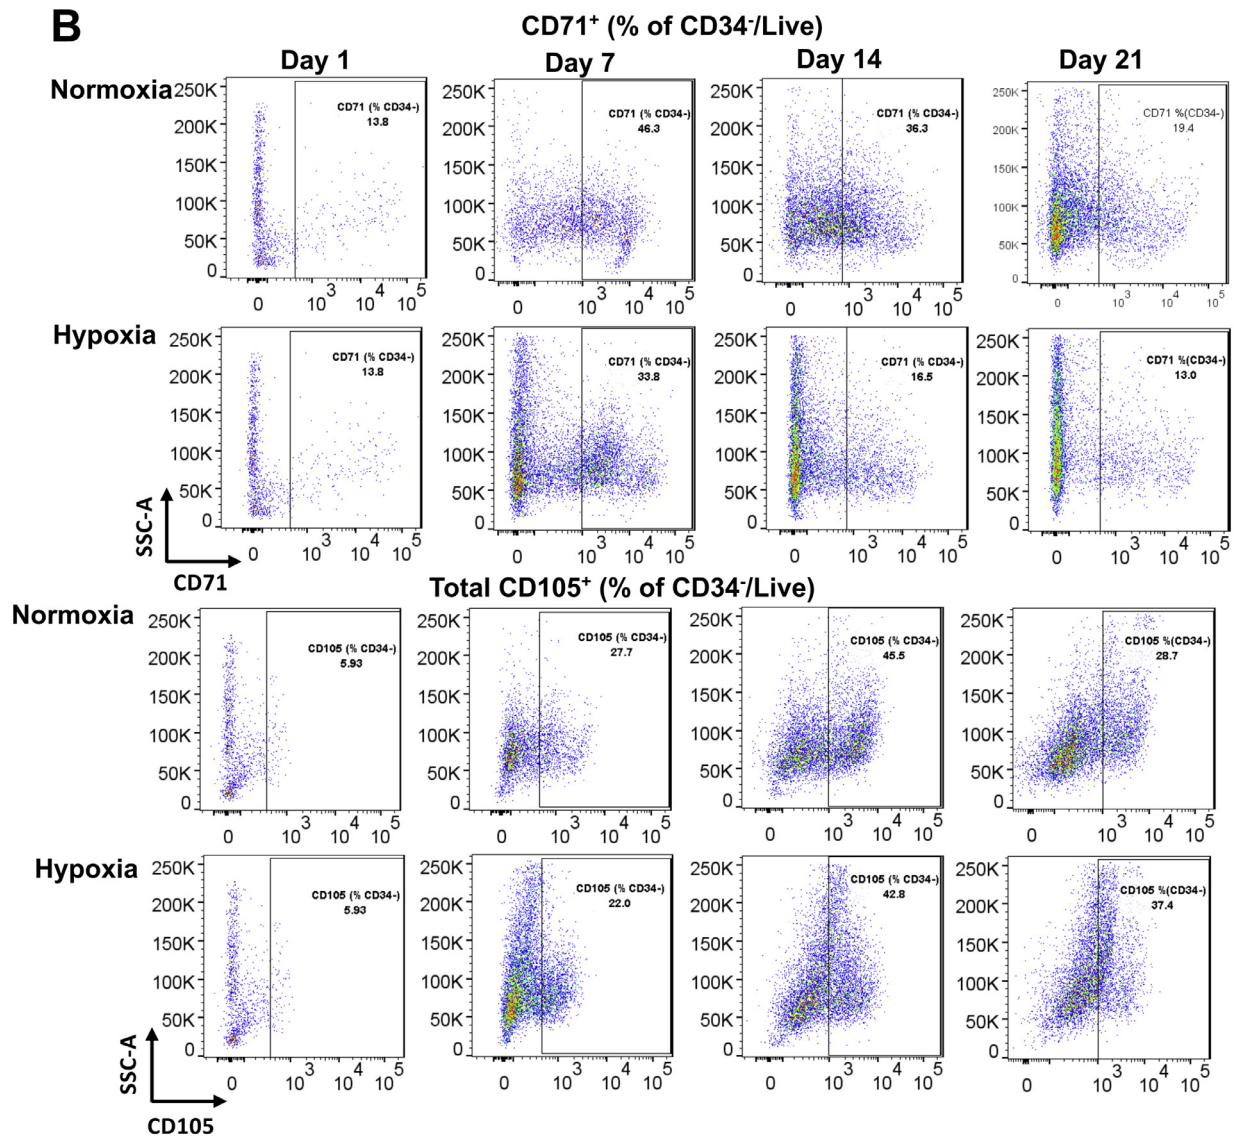

Figure E8. Continued.

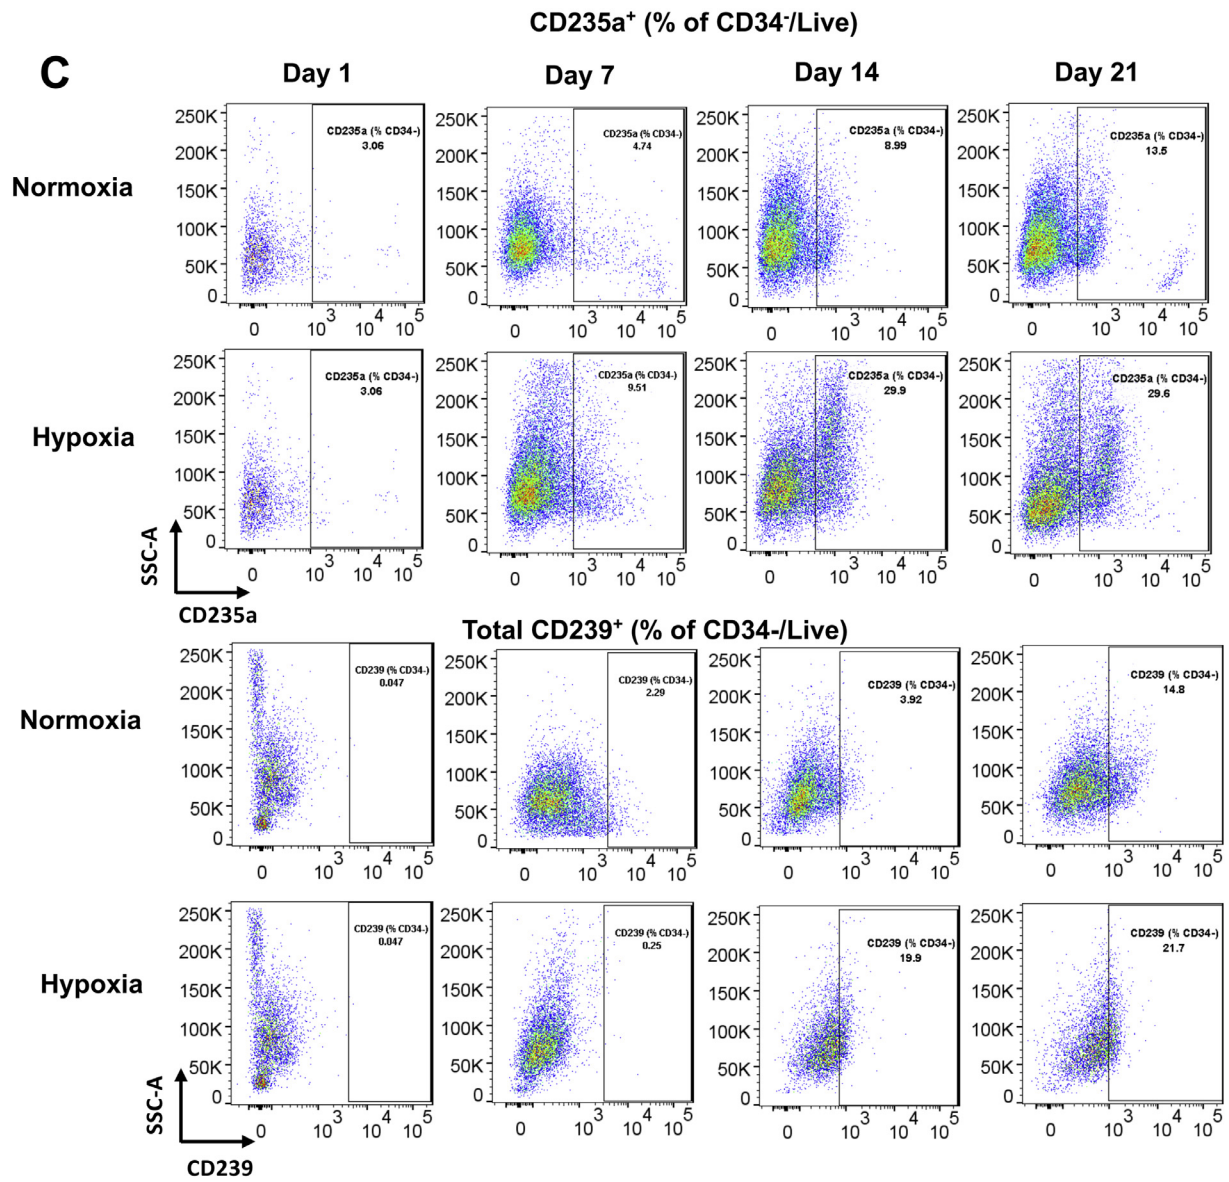

Figure E8. Continued.

**D****NORMOXIA**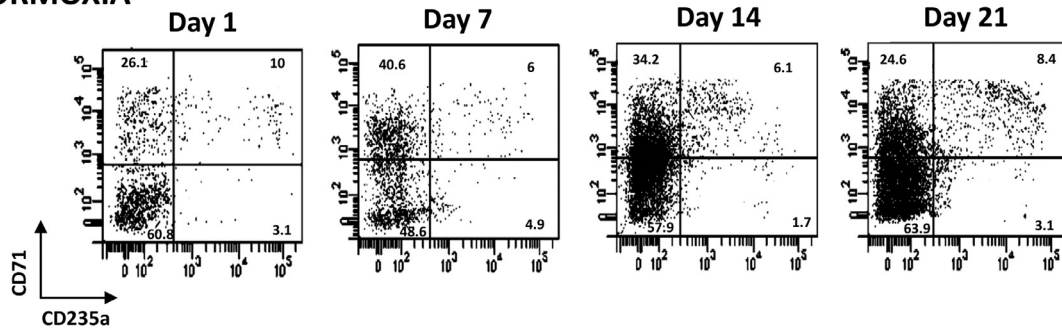**HYPOXIA**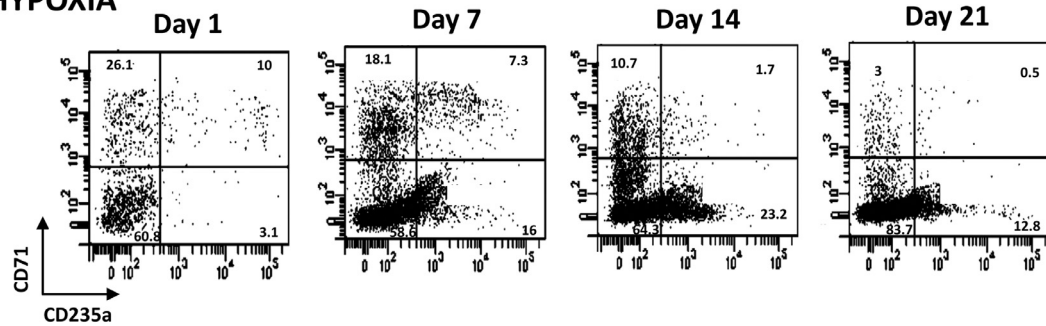**NORMOXIA**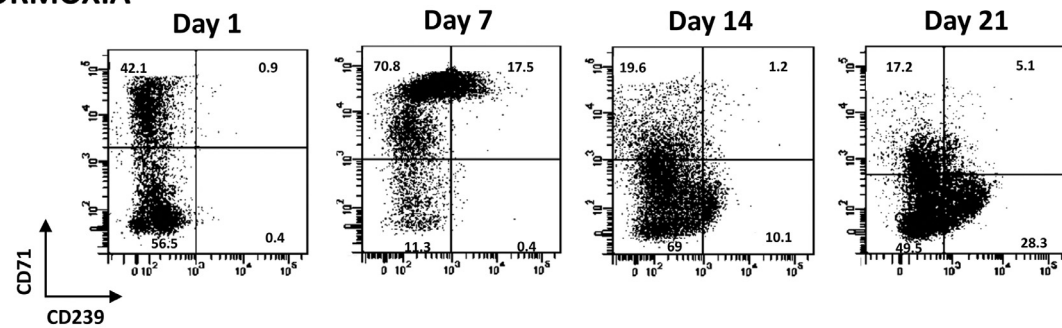**HYPOXIA**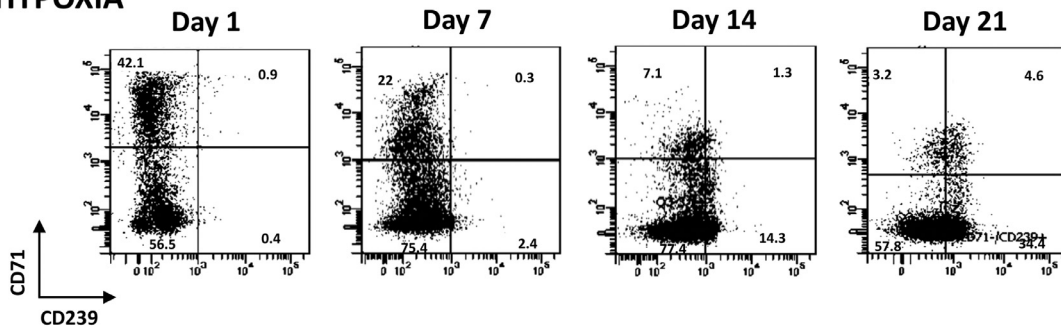

Figure E8. Continued.

**E****NORMOXIA**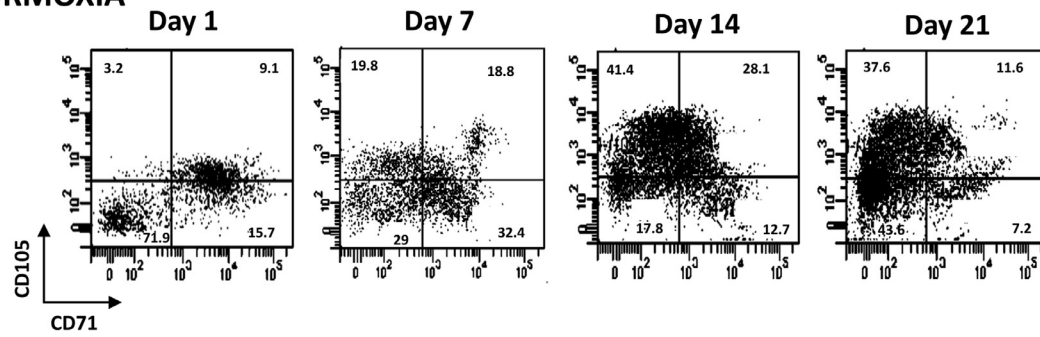**HYPOXIA**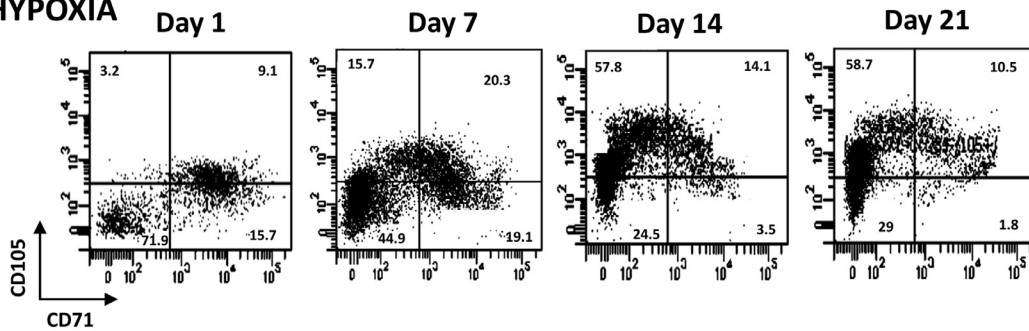**NORMOXIA**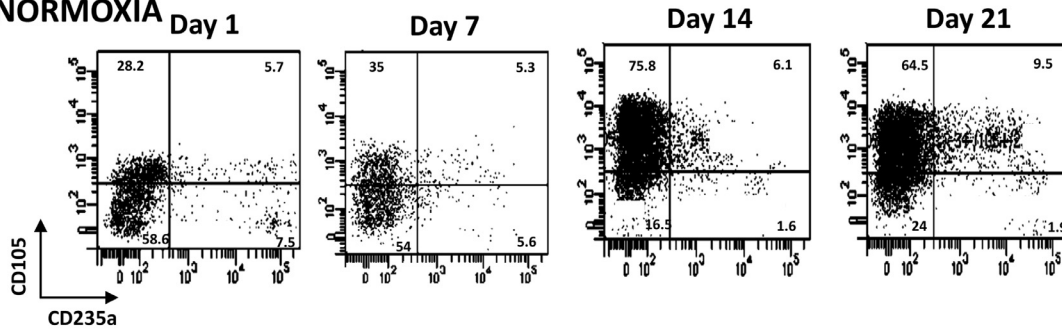**HYPOXIA**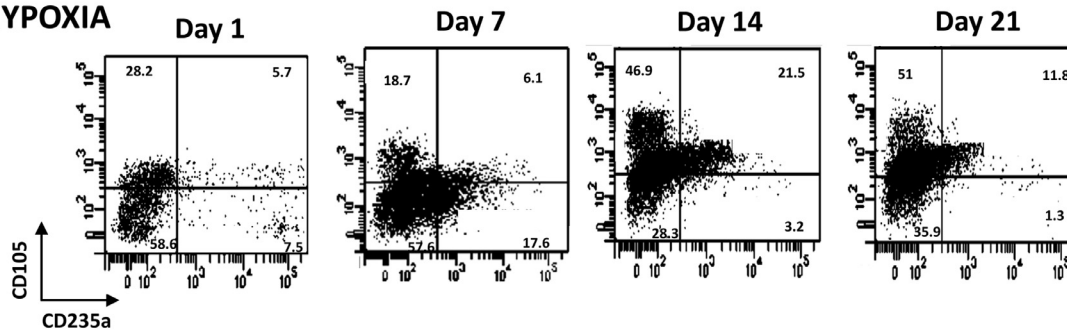

Figure E8. Continued.



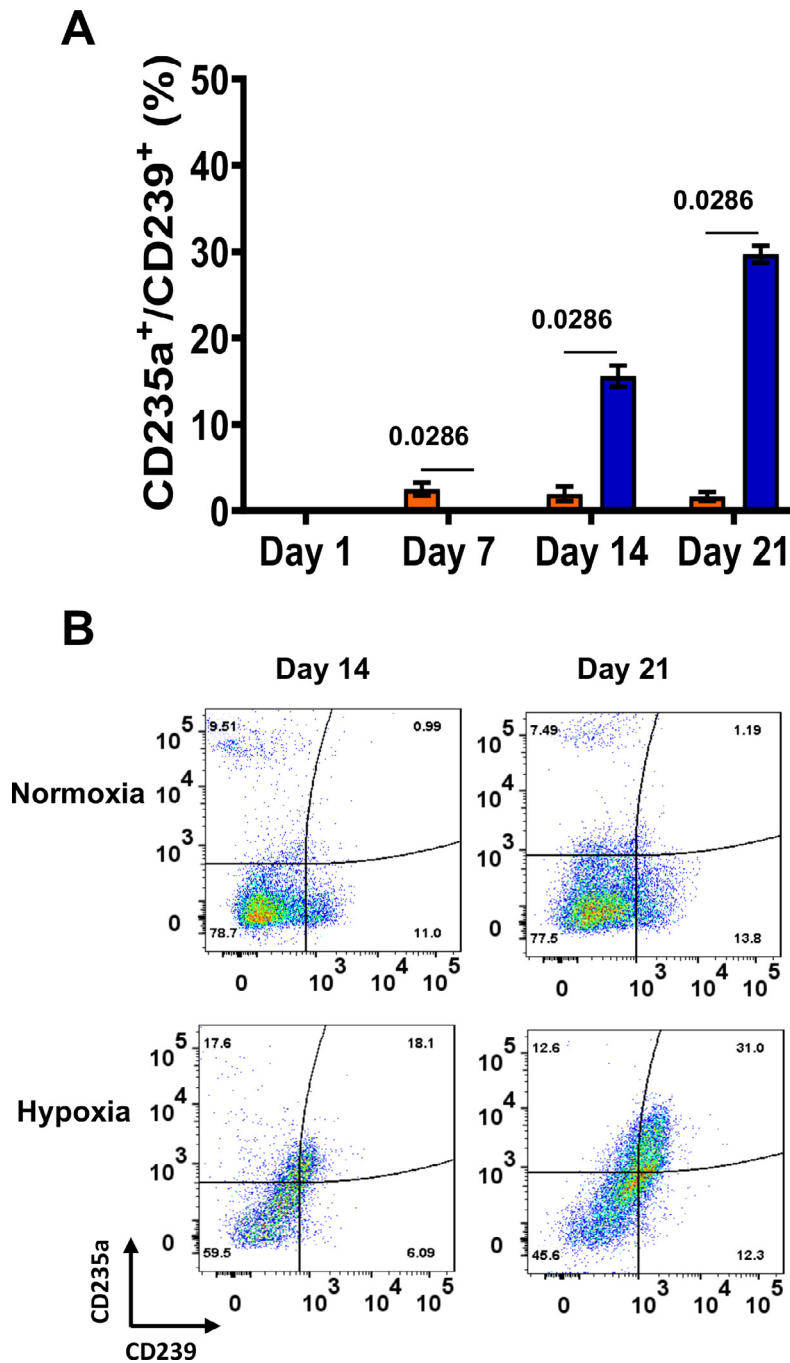

**Figure E9. Hypoxia promotes late erythroid markers.** Percentage of double positive (CD235a<sup>+</sup>/CD239<sup>+</sup>) cells is higher in hypoxia than in normoxia. The percentage of positive cells in the Lin<sup>-</sup>/Live population is shown. Data are represented as mean with standard error (n=4). Statistical analysis was performed using the Mann-Whitney test, and p-values  $\leq 0.05$  were considered significant (\* =  $p < 0.05$ , \*\* =  $p < 0.005$ , \*\*\* =  $p < 0.0005$ ).

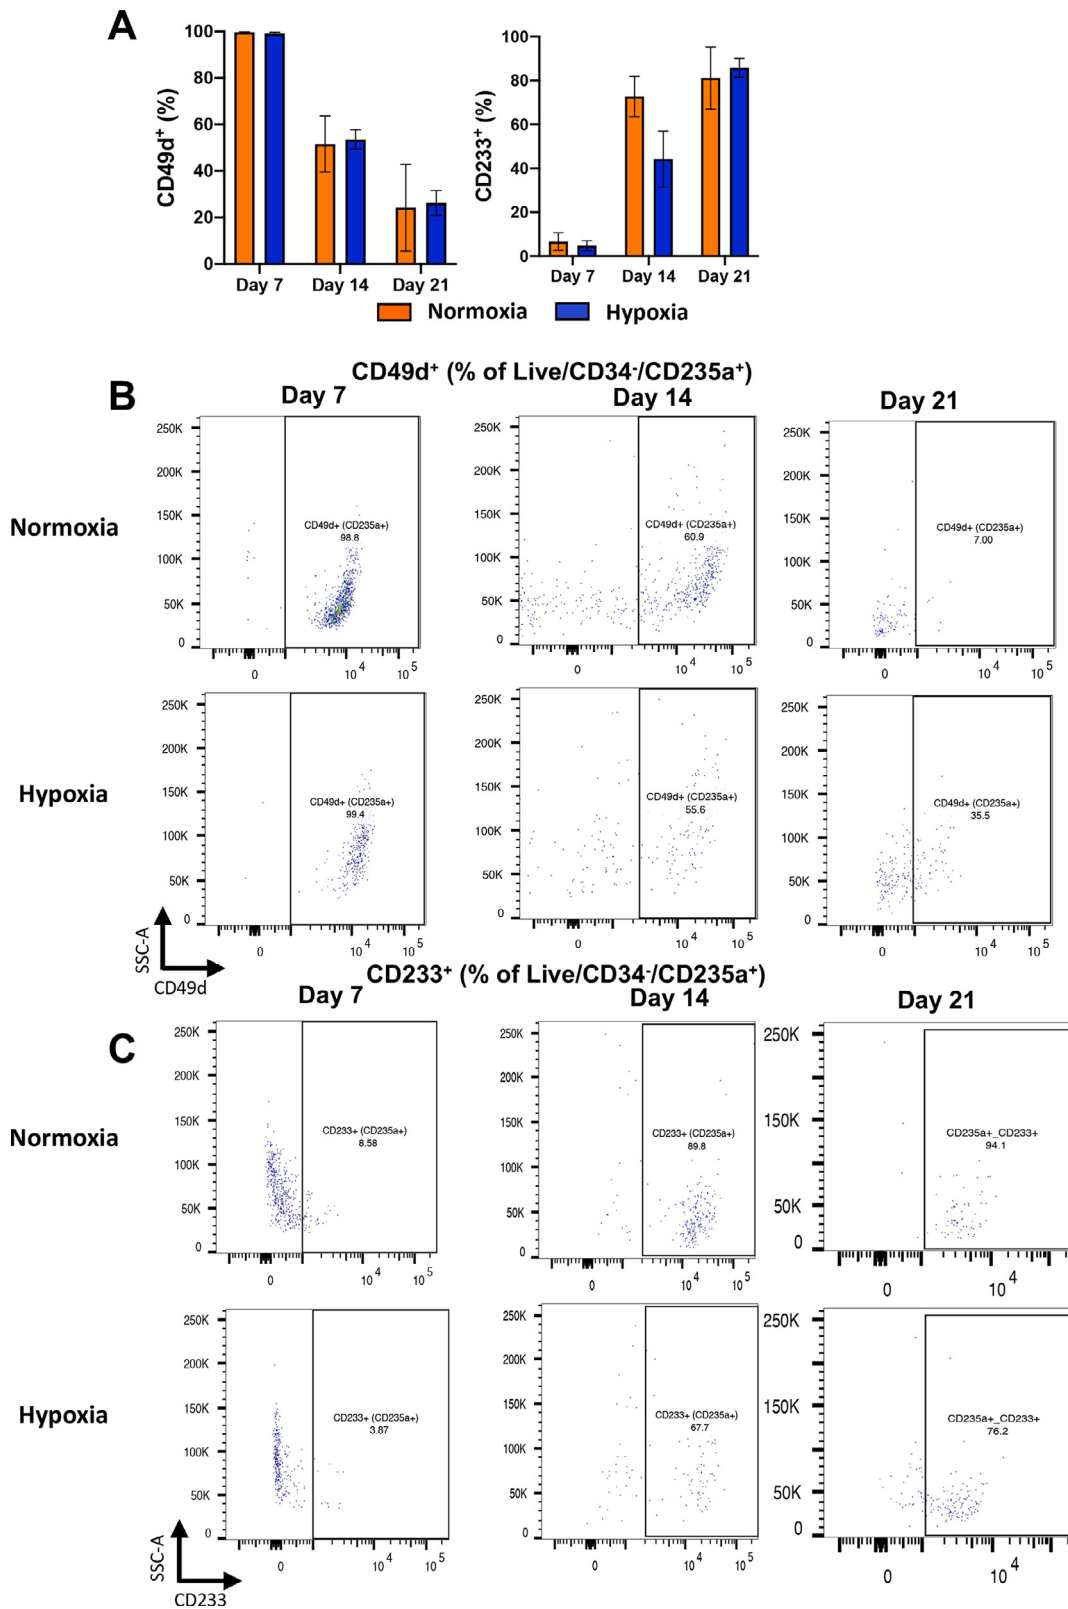

**Figure E10. Erythroblast markers are expressed at similar rates in hypoxia and normoxia.** (A) Percentage of CD49d<sup>+</sup> and CD233<sup>+</sup> cells within the CD235a<sup>+</sup> cells are shown. Data are represented as mean with standard error (n = 4). (B) Representative scatter plots for immunophenotyping of CD49d within the CD235a<sup>+</sup> population in cultures incubated in normoxia or hypoxia. (C) Representative scatter plots for immunophenotyping of CD233 within the CD235a<sup>+</sup> population in cultures incubated in normoxia and hypoxia. (D) Representative scatter plots for immunophenotyping for CD49d<sup>-</sup>/CD233<sup>-</sup>, CD49d<sup>+</sup>/CD233<sup>-</sup>, CD49d<sup>+</sup>/CD233<sup>+</sup>, and CD49d<sup>+</sup>/CD233<sup>-</sup> cells within the CD235a<sup>+</sup> population in cultures incubated in normoxia or hypoxia. Plots for immunophenotyping performed on days 7, 14, and 21 are shown.

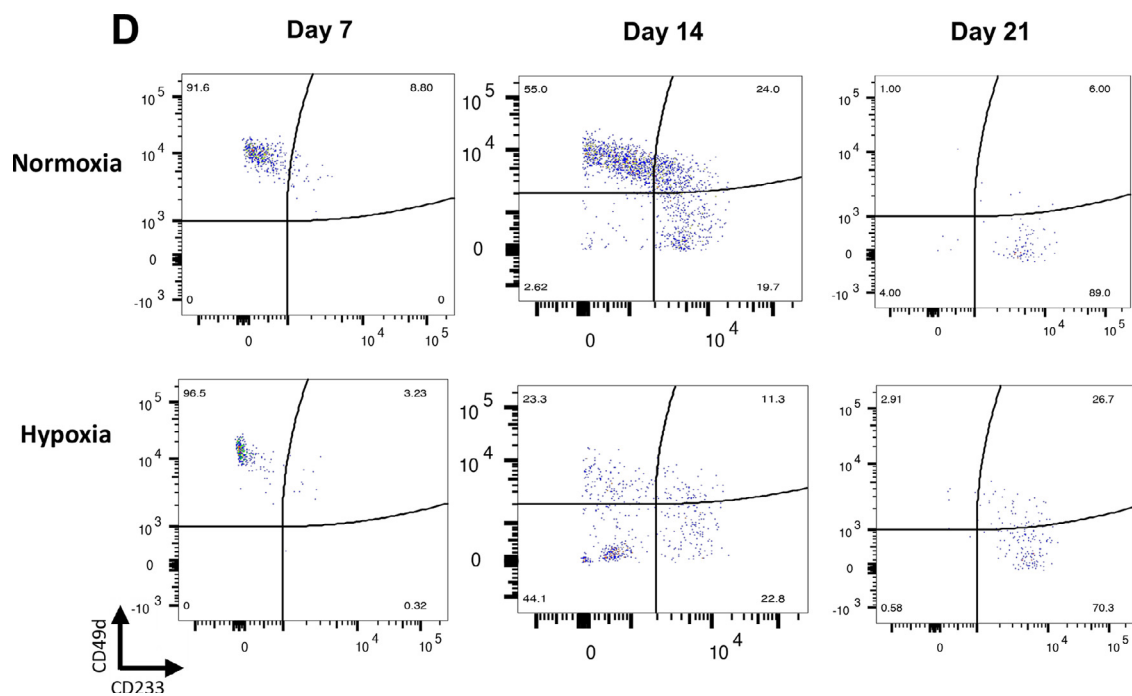

Figure E10. Continued.
